# Supplementary material for: MicroRNA Expression in Alpha and Beta Cells of Human Pancreatic Islets
Source: PLoS One. 2013 Jan 29;8(1):e55064. doi: 10.1371/journal.pone.0055064 (PMC3558471; doi:10.1371/journal.pone.0055064)
Supplement: Table S1 — RNA yield and purity of sorted human α- and β-cells. (XLS) [file pone.0055064.s002.xls]

## Sheet: Supporting Table S1
Supporting Table S1. RNA yield and purity of sorted human α- and β-cells.
Samples	RNA (ng/uL)	260/280 ratio	260/230 ratio
Alpha cells P1	13	1.7	1.8
Alpha cells P2	10.5	1.8	1.7
Alpha cells P3	5.5	1.8	1.7
Alpha cells P4	11	1.8	1.7
Alpha cells P5	9	1.7	1.7
Alpha cells P6	7	1.9	1.8
Beta cells P1	13.5	1.8	1.8
Beta cells P2	29	1.8	1.8
Beta cells P3	18	1.7	1.8
Beta cells P4	18	1.7	1.7
Beta cells P5	14	1.6	1.7
Beta cells P6	5	2	1.9
