# Supplementary material for: MicroRNA Expression in Alpha and Beta Cells of Human Pancreatic Islets
Source: PLoS One. 2013 Jan 29;8(1):e55064. doi: 10.1371/journal.pone.0055064 (PMC3558471; doi:10.1371/journal.pone.0055064)
Supplement: Table S4 — Identification of potential β-miRNA targets by analysis of islet gene populations with TargetScan, Pictar and MIRANDA algorithms. The analysis was performed on β-miRNAs, FC (β- vs α)>3 normalized to nucleolar RNU48. (XLS) [file pone.0055064.s005.xls]

## Sheet: Supporting Table S4
Genes enriched in beta cells (βG)								Genes enriched in alpha cells (αG)								Transcription Factors in alpha and beta cells (αβTF)
miRNA	Predictive algorithms							miRNA	Predictive algorithms							miRNA	Predictive algorithms
	PicTar		Sanger		TargetScan				PicTar		Sanger		TargetScan				PicTar		Sanger		TargetScan
	Gene symbols	#	Gene symbols	#	Gene symbols	#			Gene symbols	#	Gene symbols	#	Gene symbols	#			Gene symbols	#	Gene symbols	#	Gene symbols	#
hsa-miR-889			ARL6IP4,SRP68	2	KCTD5,ABHD4	2		hsa-miR-889			WDR20	1	INSR,RHOB	2		hsa-miR-889			RXRG,NUCB2	2	FOXA2,FOXP4,SMAD5,NFAT5,ASCL1,TRPS1,FOXP1	7
hsa-miR-494			IFRD2,ARHGAP8,MARK2,GRINA,PSMD3,EXOSC7	6	CFTR,GATAD2B	2		hsa-miR-494			HTRA3	1	CACNA1C,CMTM6,MESDC1,HTRA3	4		hsa-miR-494			JUND,CFDP1,MAX,FHL1,PDLIM3	5	MYT1L,JUND,PKNOX1,NFAT5,FOXJ3,TCF20,TRPS1	7
hsa-miR-127-3p			CSNK1G2,MRPS12,ARF1,ZBTB7B,SERINC2,TIMM17B,BAIAP2,ADRBK1,AP2S1,RABEP2,VWA1,MAD2L2,HAGH,CDC34,BCKDK,PKN1,DGAT1,PIGQ	18				hsa-miR-127-3p			RGS14,CACNA1C,PKIG,CYGB,SCTR,SURF6	6				hsa-miR-127-3p			FOXA2,CREB3L1,NFRKB,HOXA5,MAX,RARA,SBNO1	7
hsa-miR-323-3p			SF4,NRXN3,PIGT,CLPTM1,DEDD,AP2S1,EIF4G1	7	GHR,GATAD2B,ARF1	3		hsa-miR-323-3p			NCBP2,PPP1R3F	2	UBE2B,CACNA1C	2		hsa-miR-323-3p			SMAD5,MYT1,ATF2,MYT1L,CFDP1,HOXA5,PCAF,NFE2L2	8	SMAD2,ATF1,EBF1,ASCL1,TRPS1,SMAD3,MYT1L,PBX3,FOXP1	9
hsa-miR-433			CCL20,CFTR,PSMD3,PTGES2,MRPL18	5	CFTR,UBE2D2,DNAJC5	3		hsa-miR-433			PLEKHC1	1				hsa-miR-433			ISL1,LMO2,MYT1,HOXA5,LPXN,DEAF1	6	SMAD2,TEF,HOXA5,PAX6	4
hsa-miR-370			KLC2,IFRD2,TMEM63A,PARVB,ARF1,ZBTB7B,WFS1,AP2S1,FLNA,FKBP8,PSMD3,SCARF2,MPDU1,CREB3,DGCR2,PCYT2,DGAT1,LYPLA2,ARHGDIA,SERPINA4,LMAN2,GAA,PIGQ	23				hsa-miR-370			EFNA1,GADD45B,FEV,HNRPL,LRP1,HTRA3	6	EFNA1,IGFBP4	2		hsa-miR-370			PDLIM1,THRA,NPAS1,APBB1,FHL3	5	FOXP4,ERF	2
hsa-miR-345			DDX49,PPP5C,AK1,ARHGAP8,PTPRN,TBC1D10B,PLCB3,ENTPD2,SIL1,GLP1R,B3GAT3,APH1A,ARHGEF1,SLC29A2,ACADS,SERPINA4,SLC4A2,ACTR1B,NAPA	19				hsa-miR-345			CRP,SURF6	2				hsa-miR-345			RORA,APBB1	2	GMEB2,SMAD1,LIMD2,TRPS1	4
hsa-miR-152	KLC2,ACVR1,USP32,DEDD	4	KLC2,B3GAT3,PCNXL3,PUS1,PNPLA2,WHSC2,ARHGAP8,MIF,CRELD1,SRP68,ECEL1,DEDD,ENTPD2,VPS18	14	NEUROD1,MAFG,GATAD2B,FLOT2,ACVR1,USP32,SLC7A5,DEDD	8		hsa-miR-152	DOCK6,WDR20	2	DOCK6,KLC3,WDR20,ARNTL,LMNA	5	DOCK6,WDR20,FREQ	3		hsa-miR-152	LIMD2,FOXK2,NFAT5,MAX,E2F7,RORB,ZBTB7A,TRPS1	8	USF1,MTA2,VPS72,CUTL1,APBB1,HOXA5,ARNTL,TP53	8	SMAD2,USF1,LIMD2,MTA2,PPARD,NFAT5,E2F7,NEUROD1,ZBTB7A,TRPS1,FOXK2,BHLHB3	12
hsa-miR-204	WNT4,P4HB,APH1A,DNM2,MYO1C	5	FLNA,G0S2,NFKB2,JTB,MRPS12,DDR1,AP1S1,ATPBD1B,PNPLA2,BIN1,DNM2,PPM1G,ECH1,WFS1,SHARPIN,PIGQ	16	WNT4,BIN1,MAFG,DNM2,AP1S1	5		hsa-miR-204	BCAM,RERE,STAT6	3	GCG,RGS14,SEPW1,GADD45B,DDIT3,HNRPL,SCTR	7	RERE,FBXL11,BCL9L	3		hsa-miR-204	TCF12,NFAT5,DMTF1,SOX4,ATF2,TCF20	6	POU2F1,MYT1,EPHA1,ATF2,APBB1	5	NR3C2,NFAT5,SOX4,ZBTB7A,ATF2,TCF20,TRPS1,MYT1L,TCF12,DMTF1,TCF4,SMAD4	12
hsa-miR-136*			P4HB,ARFRP1,MRPL11	3				hsa-miR-136*			DDIT3,STK3,NDN	3				hsa-miR-136*			PBX3,PPARD,NFE2L2	3
hsa-miR-379			G0S2,TOR2A,GRINA,CDK10,CFTR,APH1A,CLTB,THOP1,CREB3,TIMM17B,GYLTL1B,DEDD	12	SCRT1	1		hsa-miR-379			DOCK6,SPHK1	2	INSR	1		hsa-miR-379			MORF4L1,RXRG,CTNNB1,NFRKB,NRF1,PDLIM7,DEAF1,ATF7	8	NFAT5	1
hsa-miR-23b	EGLN2,NRXN3,NEUROD1	3	EGLN2,COASY,LMAN2,SAFB,ITGA3,EIF4G1	6	EGLN2,LMAN2,NRXN3,ICMT,SAFB,SFXN5,ADRBK1,VCP	8		hsa-miR-23b	SEC23A,WDR20,RIN2	3	BCAM,SERTAD1,DDIT3	3	SDCBP,JAM3,BCL9L	3		hsa-miR-23b	TCF12,TEF,PKNOX1,CFDP1,NEUROD1,ETS1	6	SLC4A8,POU2F1,CFDP1,RXRG	4	PKNOX1,SMAD5,CFDP1,LASP1,EBF1,TRPS1,ZHX1	7
hsa-miR-24	TRAF7,TRPC4AP,NEUROD1,ITGA3,LYPLA2,TRIP10,PPME1,PPM1G,SFXN5	9	NUCB1,NPDC1,TRIB3,DDX49,TEX264,SERINC2,AK1,TRIP10,MRPL12,PPM1G,WDR18,AP2S1,CIB1,MAD2L2,B3GAT3,ATP13A1,TOR2A,GRINA,CLTB,CDC34,MPDU1,EGLN2,BCKDK,PLEKHH3,LYPLA2,LMAN2,ENTPD6,NAPA,HGS	29	WDR23,TRPC4AP,TRIB3,RAB4B,ITGA3,LYPLA2,WNT4,AGPAT1,ADM,SFXN5,DEDD	11		hsa-miR-24			FBXW9,DOCK6,EPHA2,SPHK1,SERTAD1,KIFC3,HTRA3	7	SERTAD1,HTRA3	2		hsa-miR-24	MXI1,LIMD2,NFAT5,MYOG,NEUROD1,CREBL2	6	ELF3,PPARD,FOXK2,PDLIM7,ARID5A,CUTL1,VAX2	7	MXI1,LIMD2,NFAT5,CREBL2	4
hsa-miR-885-5p			SCRT1,PIN1,MAD2L2,JTB,ARHGEF1,PIAS4,EMILIN2,LMAN2,SLC4A2,PIGT,RFNG,AP2S1,SIL1,VPS18	14				hsa-miR-885-5p			IGFBP4,HNRPL	2				hsa-miR-885-5p			RFX1,HES6,CTNNB1,CEBPD,NFRKB,ATF7,HBP1	7	RFX1,CTNNB1,TCF4	3
hsa-miR-495			PFN2,CLPTM1,CDC34,ARHGAP8,PLEKHH3,IAPP,CAMK2G,C3,NKX6-1,DUOX2,DEDD,PTGES2,SDAD1	13	TRAF7,CAMK2G,PFN2,BAIAP2,USP32,DEDD,CDC34	7		hsa-miR-495			GCG,SPHK1,FBXL11,E2F5,NDN	5	RERE,BTG2	2		hsa-miR-495			MORF4L1,ISL1,POU2F1,JUNB,BBX,MYCL1	6	FOXK2,MYT1,NFAT5,BHLHB3,TCF4,MAFK,ETS1	7
hsa-miR-485-3p			TRAF7,UBE2D2,ARHGEF1,SIGIRR,ARVCF,PNPLA2,RANGAP1,ACADS,GRN,ALDOA,MRPL46,AP2S1,GYLTL1B,SLC25A1	14	MAPKAPK2,GATAD2B	2		hsa-miR-485-3p			RGS14,SEPW1,EPHA2	3	RGS14	1		hsa-miR-485-3p			RXRG,PHC2	2	NRF1,SMAD4	2
hsa-miR-21	GATAD2B	1	SSU72,TRPC4AP,CCL20,RHOG	4	CCL20,GATAD2B	2		hsa-miR-21	RHOB,BTG2	2	EFNA1,DOCK6,VIM,BTG2	4	RHOB,ZFP36L2,BTG2	3		hsa-miR-21	CREBL2,HBP1	2	FOSL1,VPS72,PHTF1	3	NFAT5,CREBL2	2
hsa-miR-411			GSK3A,LCN2,GRINA,CLTB,PPP5C,ARVCF,REEP4,DGCR2,C1QL1,CSDA,PIGT,MRPL46	12	USP32	1		hsa-miR-411			MAOB,SPHK1	2				hsa-miR-411			RXRG,NFRKB,CSDA,NRF1	4	SMAD4	1
hsa-miR-432			MAN2B1,NUCB1,PEMT,TEX264,CSNK1G2,SERINC2,VGF,SRM,TIMM17B,RPUSD1,SIL1,RABEP2,EIF3S4,MAD2L2,B3GAT3,TIMP1,PCYT2,SNRP70,SERPINA4,ECEL1	20	POLDIP2	1		hsa-miR-432			BCAM,EEF1A2,NR1D1	3	CACNA1C,RERE	2		hsa-miR-432			FBLIM1,RXRG,NFRKB,IRF3,PDLIM7	5	NFAT5,HOXA5	2
hsa-miR-190b			IBRDC3,GAS6,NEUROD1,MRPL18	4	NRXN3,NEUROD1	2		hsa-miR-190b			VIM,SST	2	BRUNOL4	1		hsa-miR-190b			ATF1,XBP1,LITAF,NEUROD1,MYC	5	SMAD2,FOXJ3,TCF4,NEUROD1,SMAD4,PAX6,TRPS1	7
hsa-miR-125b	KLC2,TOR2A,RNF40,SMARCD2,FLOT2,MEF2D,LYPLA2,PPME1,KCTD5,DCTN1	10	IFRD2,PEMT,IGF2,SIRT2,TEX264,CSNK1G2,TJAP1,SIGIRR,TIMM17B,PLCB3,PSMC4,GYLTL1B,ENTPD2,SIL1,RABEP2,MAD2L2,TOR2A,SMARCD2,MRPL11,ARHGEF1,BCKDK,ACADS,ARL6IP4,DGAT1,TNFRSF1A,ACTR1B,DNM2,MRPL46,PTGES2,DCTN1	30	KLC2,RABEP2,RNF40,SMARCD2,ARHGEF1,MEF2D,FLOT2,HCN3,LYPLA2,DGAT1,PPME1,TIMM17B,MAPKAPK2,DCTN1,ADRBK1	15		hsa-miR-125b	RERE	1	EPHA2,PPP1R3F	2	SRF	1		hsa-miR-125b	TEF,LIMD2,MYT1,PHC2,ZBTB7A,TRPS1,ETS1	7	USF1,RFX3,AGGF1,PHC2,TGFB1I1	5	SMAD2,TEF,LIMD2,AGGF1,MYT1,ZBTB7A,TRPS1,ETS1,SLC4A8,FOXK2,PHC2,SMAD4	12
hsa-miR-376c			MAD2L2,G0S2,CCL20,ARFRP1,SMARCD2,LETM1,EXOSC7,WHSC2,CREB3,SERPINA4,GAS6,ECH1,ENTPD2	13				hsa-miR-376c			DRD1IP,ARNTL	2	SRF	1		hsa-miR-376c			CFDP1,GTF2IRD1,ARNTL,NFE2L2,SBNO1	5	MYT1L,NFAT5,RORB,SOX4	4
hsa-miR-376a			ERP29,NRXN3,ALDOA,GAS6,PPM1G,ECH1,SRP68,WDR18,HGS	9	UBE2D2	1		hsa-miR-376a			GCG,FBXW9,NCBP2,PPP1R3F,DDIT3,ARNTL,BICC1	7	PPP1R3F,BRUNOL4	2		hsa-miR-376a			CREB3L1,SREBF2,NUCB2,PBX3,TCF19,CFDP1,PCAF,HOXA5,RORB,ARNTL,CCNDBP1	11	FOXJ3,ZBTB7A	2
hsa-miR-148a	KLC2,ACVR1,USP32,DEDD	4	ATP6V0D1,G0S2,B3GAT3,SSU72,PCNXL3,THOP1,PNPLA2,MIF,CRELD1,BAIAP2,ECEL1,ENTPD2,VPS18	13	NEUROD1,MAFG,GATAD2B,FLOT2,ACVR1,USP32,SLC7A5,DEDD	8		hsa-miR-148a	DOCK6,WDR20	2	DOCK6,KLC3,ARNTL,LMNA	4	DOCK6,WDR20,FREQ	3		hsa-miR-148a	LIMD2,FOXK2,NFAT5,MAX,E2F7,RORB,ZBTB7A,TRPS1	8	USF1,MTA2,VPS72,HOXA5,ARNTL,APBB1,TRPS1	7	SMAD2,USF1,LIMD2,MTA2,PPARD,NFAT5,E2F7,NEUROD1,ZBTB7A,TRPS1,FOXK2,BHLHB3	12
hsa-miR-539			FASTK,GLP1R,PUS1,SMARCB1,CAMK2N1,WHSC2,PSMC4,GNAI2	8	WHSC2,JTB,SFXN5,ADM	4		hsa-miR-539			SDCBP,PKIG,HNRPL,LMNA,LRP1	5	CMTM6,MESDC1	2		hsa-miR-539			CSRP1,POU3F4,CCNDBP1	3	E2F7,SMAD4,SOX4,YBX1,MYCL1	5
hsa-miR-543			COASY,REEP4,MRPL12,SF4,PAOX,CSDA	6	CAMK2G	1		hsa-miR-543			DRD1IP,RERE,WDR20,CABC1,LMNA	5	RTN1,MESDC1	2		hsa-miR-543			USF1,MORF4L1,SLC4A8,NKX2-2,PBX2,CSDA,DEAF1,CTDSPL	8	PBX3,ATF1,NFAT5,E2F7,CREBL2,CTDSPL,TRPS1,FOXP1	8
hsa-miR-184			NUCB1,CYBASC3,RAB25,IFRD2,GSK3A,NFKB2,SAFB,CSNK1G2,AP1S1,THOP1,PSMC4,NKX6-1,VPS18,CIB1,MAD2L2,SCARF2,CLPTM1,DGAT1,ARHGDIA,GAS6,AGPAT1	21				hsa-miR-184			INSR	1				hsa-miR-184	CREB3L1	1	FOXA2,CTDSP1,LITAF,HOXA5	4
hsa-miR-27b	VGF,SEC61A1,PPME1,PFN2,PPP4C,ACVR1,PPM1G,PLEKHJ1	8	TOR2A,EXOSC7,VGF,LYPLA2,MRPL12,NKX6-1,PPP4C,PIGT,ENTPD6,ECEL1,HGS,PIGQ	12	PPME1,HYOU1,PLEKHJ1	3		hsa-miR-27b	INSR,PDZK1IP1,ARNTL,MESDC1,PTPRT,BTG2	6	INSR,CRP,SCTR,RALGDS,MESDC1	5	INSR,PDZK1IP1,MESDC1,PTPRT,FREQ,BTG2	6		hsa-miR-27b	ISL1,RXRA,AGGF1,MYT1,LITAF,E2F7,RARA,RFX3,FOXP4,CFDP1,HOXA5,FOXJ3,ARNTL,NFE2L2,ZHX1	15	ISL1,RXRG,THRA,PHTF1,RARA,NFE2L2	6	SMAD2,ISL1,SMAD5,RXRA,AGGF1,MYT1,NFAT5,LASP1,LITAF,E2F7,RARA,FOXP4,HOXA5,BHLHB3,PHC2,ZHX1	16
hsa-miR-491-5p			PIN1,RAB25,LCN2,NFKB2,TEX264,JOSD2,TJAP1,RASD1,THOP1,PPP4C,PERQ1,CIB1,COASY,RABEP2,MAD2L2,JTB,PSMD3,ARHGEF1,CREB3,PNPLA2,DGAT1,GAA,GAS6,NPLOC4,NAPA	25	AGPAT1,GATAD2B	2		hsa-miR-491-5p			INSR,FBXW9	2	DOK4	1		hsa-miR-491-5p			RFX1,RXRG,PBX2,IRF3,VAX2,FHL3	6	MYT1L,FOXP4,PBX2	3
hsa-miR-410			TRIP10,MRPL11,ADM	3	ADM	1		hsa-miR-410			SEC23A,PLEKHC1	2	UBE2B,RERE,PPP1R3F,FBXL11,BCL9L	5		hsa-miR-410			SLC4A8,RFX3,RORB,ARID5A,NFE2L2	5	SMAD2,ATF1,MYT1,NFAT5,ETS1,MYT1L,PBX3,TCF4,DLX3	9
hsa-miR-185	FLOT2,GATAD2B,DEDD,EIF4G1	4	APH1A,EXOSC7,ARHGEF1,RHOG,SRM,GAA,TIMM17B,PPP4C,PSMC4,PIGT,GYLTL1B	11				hsa-miR-185	NR1D1,MESDC1,BTG2	3	EFNA1,IGFBP2,NR1D1,BICC1,LRP1	5	RERE	1		hsa-miR-185	GMEB2,TCF12,LIMD2,CTNNB1,THRA	5	TCF12,POU3F4,CTNNB1,PBX2	4	TCF12,PBX2,THRA,FOSL2,EBF1,NCOA2	6
hsa-miR-487b			TRPC4AP,NFKB2,CFTR,MRPL11,CSNK1G2,EEF2,EIF4G1,WHSC2,VGF,GRN,LYPLA2,TIMM17B,MRPL46	13				hsa-miR-487b			CACNA1C,RIN2	2				hsa-miR-487b			RFX1,RFX3,RXRA,PDLIM1	4
hsa-miR-382			WHSC2,MAD2L2,ECH1,MRPL11,DCTN1	5				hsa-miR-382			SERTAD1,VIM	2				hsa-miR-382			NR1H4,FOSL1,LPXN,MYC,NFE2L2	5	LIMD2,DLX3,NCOA2	3
hsa-miR-574-3p			EXOSC7,ATP6V0E2,SIGIRR,THOP1,RANGAP1,AGTRAP,GRN,ARHGAP8,PAOX,PPP4C,WFS1,SHARPIN,AP2S1,VPS18,MAD2L2,GPS1,TRPC4AP,IBRDC3,CDK10,EEF2,ARVCF,EGLN2,ARHGDIA,ENTPD6,ADM,HGS	26				hsa-miR-574-3p			RGS14,SRF,CACNA1C,FBXW9,SEPW1,PPP1R3F,FBXL11,MESDC1	8				hsa-miR-574-3p			MTA2,LASP1,WTIP,HOXA5,FHL1,DEAF1	6	RXRA,FOSL2	2
hsa-miR-331-3p			SSNA1,IFRD2,LCN2,PPP5C,VCP,ATPBD1B,MRPL12,SHARPIN,SIL1,AKT1,DDR1,CDC34,REEP4,GAS6,PLEKHJ1,HGS,DDX49,TJAP1,RANGAP1,ARHGAP8,BIN1,PSMC4,PPP1R14B,RPUSD1,SLC25A1,COASY,B3GAT3,MAD2L2,TOR2A,FKBP8,ARVCF,ARL6IP4,GAA	33	SEC61A1,BAIAP2,POLDIP2,DDR1	4		hsa-miR-331-3p			SLC12A7,FBXW9,CORO6,PKIG,WDR20,SCTR,HTRA3	7				hsa-miR-331-3p			ELF3,USF1,SREBF2,NFRKB,ARID5A,ERF,RARA	7	ERF	1
hsa-miR-30a*			PNPLA2,PEMT,IBRDC3,NKX6-1,BAIAP2,ZBTB7B	6				hsa-miR-30a*			SEPW1,PPP1R3F,CRP	3				hsa-miR-30a*			ATF1,XBP1,NFRKB,MAX,ATF2,MYC,VAX2	7
hsa-miR-656			ARHGEF1,MRPL18	2	TRAF7,EMILIN2,ALKBH5,NRXN3,DDR1	5		hsa-miR-656			ARNTL	1	UBE2B,INSR,CACNA1C,DOK4,FBXL11	5		hsa-miR-656			RXRG,TCF4,JUNB,ARNTL,HBP1,NFE2L2	6	SMAD2,SOX6,PPARD,BHLHB3,JUNB,SOX4	6
hsa-miR-335			NPDC1,DRAP1,GPS1,PUS1,PARVB,SMARCB1,CDC34,MYBBP1A,VCP,RHOG,PIAS4,ECEL1	12	MEF2D	1		hsa-miR-335			GADD45B,SCTR	2				hsa-miR-335	ISL1,MAX,ZHX1	3	NR1H4,RXRG,VPS72,CTNNB1,BBX	5	ISL1,MAX	2
hsa-miR-129-3p			MRPS12,SERINC2,THOP1,RANGAP1,SHARPIN,GYLTL1B,RABEP2,TIMP1,SMARCB1,ARHGEF1,CREB3,MEF2D,WNT4,ALKBH5,PCYT2,PLEKHH3,DCTN2,PIGT,PDX1	19	CAMK2N1,GNAI2,USP32,DEDD	4		hsa-miR-129-3p			PKIG	1	DOK4	1		hsa-miR-129-3p			CSRP1,EPHA1,ETV5,TP53	4	SMAD3,NFAT5,SOX4,ETV5,TRPS1	5
hsa-miR-324-5p	CAMK2G	1	KLC2,SIRT2,LCN2,DDX49,MRPS12,WHSC2,AGTRAP,SRM,ARHGAP8,PAOX,WFS1,SBF1,SIL1,ATP6V0D1,MAD2L2,SMARCD2,CLPTM1,ARHGEF1,ARVCF,REEP4,DGAT1,EMILIN2,GAA,DNM2,NAPA	25				hsa-miR-324-5p			PKIG,IGFBP4,SCTR,HTRA3	4	SRF,FREQ	2		hsa-miR-324-5p	NFAT5,THRA,BBX	3	NFKB1,LMO2,HES6,CTDSP1,WTIP,DEAF1,BBX,CREB3L3,THRA	9	SMAD2,NFAT5,TRPS1	3
hsa-miR-668			PCNXL3,CDK10,CLPTM1,ARVCF,THOP1,SLC4A2,CAMK2G,PPM1G,ENTPD6,BAIAP2,WFS1,ADRBK1,TCF1,SIL1	14	CAMK2G	1		hsa-miR-668			DOCK6,RPL24	2				hsa-miR-668			TCF1	1	SMAD5,CTNNB1,EBF1,TCF20	4
hsa-miR-15a	KLC2,G0S2,VAT1,SMARCD2,FLOT2,EGLN2,ARHGDIA,LYPLA2,TRIP10,GHR,USP32,DEDD	12	G0S2,PEMT,SSU72,SRM,TRIP10,GOT2,BIN1,GYLTL1B,RFNG,DGCR14,B3GAT3,MAD2L2,SMARCD2,CREB3,DCTN2,PLEKHJ1,DCTN1	17	CYBASC3,G0S2,VAT1,IRF2BP1,RAB4B,MYO1C,EGLN2,WNT4,ARHGDIA,LYPLA2,TRIP10,GHR,BAIAP2,GYLTL1B,DEDD	15		hsa-miR-15a	BCL9L,LTB,BTG2	3	INSR,FBXW9,DRD1IP,RTN1,CRP,PLEKHC1	6	INSR,BCL9L,FREQ,BTG2,XPR1	5		hsa-miR-15a	SMAD5,E2F7,EPHA1,SMAD3,FOSL1,PBX3,DMTF1,CTDSPL,ZHX1	9	DMTF1,EPHA1,FHL2	3	SMAD5,LITAF,E2F7,EPHA1,SMAD3,MYT1L,FOSL1,NFIC,BHLHB3,DMTF1,CTDSPL,MAFK	12
hsa-miR-193b	CDK10,UBE2D2	2	TEX264,ZBTB7B,SIGIRR,VGF,RANGAP1,PERQ1,PPP1R14B,GYLTL1B,DNAJC5,ATP2A3,TRPC4AP,SMARCB1,EEF2,DPEP1,ARVCF,DGCR2,ARL6IP4,GNAI2,ECEL1,HDAC3	20	ALKBH5	1		hsa-miR-193b	BTG2	1						hsa-miR-193b	TCF12,MAX,EBF1,ZHX1	4	MAX,IRF3,BBX,NFE2L2	4	TCF4,ETS1	2
hsa-miR-409-5p			KLC2,MAD2L2,B3GAT3,HAGH,IRF2BP1,ALKBH5,ARL6IP4,PLEKHH3,PAOX,ACTR1B	10	KLC2	1		hsa-miR-409-5p			SEC23A,CORO6,DOCK6,LRP3,LRP1	5	CYGB	1		hsa-miR-409-5p			HES6,RORA,PDLIM7,BBX,CUTL1	5	TRPS1	1
hsa-miR-409-3p			AKT1,MAD2L2,UBE2D2	3	ACVR1,UBE2D2	2		hsa-miR-409-3p			SEPW1,E2F5,STK3,NDN,PTPRT	5	NDN	1		hsa-miR-409-3p			SMAD1,HOXA5,ATF7,FHL2	4	FOXK2,RORB,HBP1,TRPS1	4
hsa-miR-27a	VGF,PPME1,PPP4C,ACVR1,PPM1G,PLEKHJ1	6	G0S2,TOR2A,EXOSC7,VGF,LYPLA2,MRPL12,PPP4C,ENTPD6,ECEL1,PLEKHJ1,PIGQ,HGS	12	PPME1,HYOU1,PLEKHJ1	3		hsa-miR-27a	INSR,PDZK1IP1,ARNTL,MESDC1,PTPRT,BTG2	6	INSR,CRP,SCTR,MESDC1	4	INSR,PDZK1IP1,MESDC1,PTPRT,FREQ,BTG2	6		hsa-miR-27a	ISL1,RXRA,AGGF1,MYT1,LITAF,E2F7,RARA,RFX3,FOXP4,CFDP1,HOXA5,FOXJ3,ARNTL,NFE2L2,ZHX1	15	ISL1,RXRG,THRA,ARID5A,PHTF1,RARA,NFE2L2	7	SMAD2,ISL1,SMAD5,RXRA,AGGF1,MYT1,NFAT5,LASP1,LITAF,E2F7,RARA,FOXP4,HOXA5,BHLHB3,PHC2,ZHX1	16
hsa-miR-96	SCRT1,VAT1,ARF1,MYO1C,FLOT2,MEF2D,ARHGDIA,DGCR2,CSDA,ACVR1,SLC25A1	11	SSNA1,IFRD2,TRIB3,SIGIRR,ATPBD1B,GRN,BAIAP2,SIL1,SLC25A1,IBRDC3,SCARF2,EEF2,ARL6IP4,LYPLA2,CSDA,ECEL1,PLEKHJ1,SDAD1	18	VAT1,TRIB3,MYO1C,MEF2D,CAMK2N1,DGCR2,ACVR1,SLC25A1	8		hsa-miR-96	CACNA1C,RERE,DOK4,E2F5,CYGB,LMNA	6	RGS14,CYB5R3,EFNA1,FEV,VIM,CABC1,DDIT3,LMNA	8	CACNA1C,DOK4,E2F5,DDIT3	4		hsa-miR-96	SMAD1,ISL1,SOX6,CTDSP1,HBP1,MORF4L1,FOXK2,HOXA5,CSDA,PBX2,NKX2-2,CTDSPL	12	MORF4L1,FOXK2,CHES1,CSDA,HOXA5,DLX3,HBP1	7	ISL1,SOX6,CTDSP1,EBF1,MORF4L1,TCF19,FOXK2,PBX2,CTDSPL,PAX6,ZHX1	11
hsa-miR-758			IFRD2,TOR2A,IBRDC3,PLEKHH3,WDR18,BAIAP2,SHARPIN,ENTPD2,SDAD1	9				hsa-miR-758			SLC12A7,FBXW9	2				hsa-miR-758			NCOR1,FHL1	2	MYT1L,ZBTB7A,TCF20,TRPS1	4
hsa-miR-22*			ATPBD1B,PNPLA2,BIN1,TEX264,MRPL11,MRPS12,MRPL18	7				hsa-miR-22*			DOCK6,HTRA3	2				hsa-miR-22*			MXI1,OLIG1,MTA2,AGGF1,CEBPD,YBX1,EBF1,POU2F1	8
hsa-miR-30a			NEUROD1,SMARCD2,VCP,RASD1,VGF,FLOT2,NTHL1,C1QL1,TBC1D10B,KCTD5,CSDA,ACVR1,GNAI2,MRPL18,SDAD1	15	PFN2,NEUROD1,RASD1,TBC1D10B,GOT2,KCTD5,SBF1,VAT1,NRXN3,SMARCD2,MAFG,RAB4B,UBE2D2,MEF2D,CAMK2N1,ACVR1,GNAI2,AP1B1,SDAD1	19		hsa-miR-30a			SEC23A,CACNA1C,RHOB,CYGB	4	SEC23A,CACNA1C,RHOB,KLF10,RALGDS,FREQ,XPR1,HTRA3	8		hsa-miR-30a			CFDP1,MYT1,CSDA,HOXA5,NEUROD1,PHTF1	6	SMAD2,GMEB2,SMAD1,NR3C2,ATF1,NFAT5,E2F7,NEUROD1,SOX4,ZBTB7A,TRPS1,FOXP4,NKX2-2	13
hsa-miR-484			NUCB1,NPDC1,PCNXL3,ARFRP1,ZBTB7B,VCP,THOP1,SRM,BAIAP2,WFS1,ENTPD2,MAD2L2,TRPC4AP,APH1A,CLTB,CDC34,MPDU1,EGLN2,CREB3,EMILIN2,DGAT1,SERPINA4,GAA,GAS6,FZR1,PLEKHJ1,DCTN1	27	LYPLA2,RNF40,MAPKAPK2,DGCR14,VCP	5		hsa-miR-484			CACNA1C,CORO6,GADD45B,IGFBP4,SCTR,LMNA,HTRA3	7	SERTAD1	1		hsa-miR-484			SREBF2,THRA,HOXA5,PDLIM7,MYOG,DEAF1,CREB3L3	7	PKNOX1,HOXA5,FHL1,FOSL2,TRPS1	5
hsa-miR-340*			MAD2L2,MYH14,MPDU1,THOP1,PCYT2,TRIP10,SERPINA4,GAS6	8				hsa-miR-340*			DRD1IP,TM4SF4,CALCOCO1	3				hsa-miR-340*			POU2F1,DEAF1	2
hsa-let-7b	MEF2D,GHR,TIMM17B,SYT7,USP32,CDC34,AP2S1	7	PEMT,PCNXL3,GPX4,PARVB,JOSD2,AP1S1,PIAS4,ARHGAP8,TIMM17B,TST,AP2S1,SCYL1,SLC25A1,MAD2L2,CDC34,USP32,DCTN1	17	B3GAT3,CDC34,AP1S1,MEF2D,EGLN2,GHR,TIMM17B,ICMT,SYT7,USP32	10		hsa-let-7b	E2F5,MESDC1,BTG2	3	BCAM,PKIG,SERTAD1	3	INSR,E2F5,MESDC1,BTG2	4		hsa-let-7b	TEF,PBX3,LIMD2,PBX2,NRF1	5	CREB3L1,SREBF2,PDLIM7,EPHA1,FOSL1,STAT2,MYOG,MYC	8	SMAD2,PBX3,LIMD2,CEBPD,PBX2,MYCL1,TP53,FOXP1	8
hsa-miR-381			B3GAT3,TRPC4AP,HAGH,PUS1,JTB,PSMD3,SMARCB1,PIAS4,ARHGAP8	9	ACVR1,NEUROD1,MAFG,CFTR,ITGA3,SMARCB1	6		hsa-miR-381			SRF,PPP1R3F,DDIT3,HNRPL	4	CACNA1C	1		hsa-miR-381			CUTL1,FHL2	2	RFX1,NFAT5,NRF1,NEUROD1,SOX4,EBF1,HBP1,ETS1,MYT1L,CTNNB1,FOXJ3,DMTF1,SMAD4	13
hsa-miR-29c*			MAD2L2,IFRD2,BCKDK,ARL6IP4,CAMK2G,TIMM17B,MARK2,FZR1,MRPL18	9				hsa-miR-29c*			EEF1A2,LTB,LRP1	3				hsa-miR-29c*			GMEB2,CFDP1,WTIP,MYCL1,APBB1	5
hsa-miR-30e*			PNPLA2,IBRDC3,NKX6-1,EXOSC7,ZBTB7B	5				hsa-miR-30e*			SEPW1,PPP1R3F	2				hsa-miR-30e*			XBP1,NFRKB,ATF2,MYC,VAX2	5
hsa-miR-598			MAD2L2,SERPINA4,TST,MRPL11,SIL1	5				hsa-miR-598			RGS14,FBXW9,DDIT3,NDN,BCL9L,LRP1	6				hsa-miR-598			NCOR1,NFRKB,MAX,PDLIM7	4
hsa-let-7c	CDC34,MEF2D,TIMM17B,GHR,SYT7,DUOX2,USP32,AP2S1,SLC25A1	9	PEMT,PCNXL3,PARVB,JOSD2,PIAS4,WHSC2,TRIP10,ARHGAP8,TIMM17B,TST,AP2S1,SLC25A1,CDC34,RHOG,LYPLA2,DCTN1	16	B3GAT3,CDC34,AP1S1,MEF2D,EGLN2,GHR,TIMM17B,ICMT,SYT7,USP32	10		hsa-let-7c	E2F5,MESDC1,BTG2	3	PKIG,NR1D1	2	INSR,E2F5,MESDC1,BTG2	4		hsa-let-7c	TEF,PBX3,LIMD2,PBX2,MYC	5	STAT2,PDLIM7,EPHA1,MYC,NCOA2	5	SMAD2,PBX3,LIMD2,CEBPD,PBX2,MYCL1,TP53,FOXP1	8
hsa-miR-483-5p			NUCB1,IFRD2,SAFB,STXBP2,GRN,ARHGAP8,TBC1D10B,TIMM17B,P4HB,NKX6-1,SRP68,ADRBK1,VPS18,POLR2E,VAT1,TIMP1,GRINA,JTB,UBE2D2,CDC34,ARHGEF1,MYO1C,PNPLA2,C1QL1,LYPLA2,CAMK2G	26				hsa-miR-483-5p			BCAM,SMPDL3A,EEF1A2,SERTAD1,NR1D1,KIFC3,MESDC1	7				hsa-miR-483-5p			PPARD,NKX2-2,MAX,FHL1,CCNDBP1	5
hsa-miR-203	VAT1,DGCR2,GHR,SCYL1	4	CREB3,ZGPAT,ACVR1	3	CREB3,DGCR2,ZBTB7B	3		hsa-miR-203	ARNTL	1	INSR,ARNTL,HNRPL	3	ARNTL	1		hsa-miR-203	SMAD1,ISL1,LASP1,NRF1,ATF2,TRPS1,TCF12,MORF4L1,FOXK2,ARNTL	10	SOX6,FOXK2,ARNTL	3	LASP1,EBF1,HBP1,TRPS1,SMAD3,MORF4L1,FOXK2,FOXJ3,ARNTL,TCF4,FOSL2,MAFK,FOXP1	13
hsa-miR-22	BIN1,PFN2,NEUROD1,PPM1G,TRUB1	5	IFRD2,TRUB1,MYBBP1A,AP1S1,BIN1,PPM1G,BAIAP2,ENTPD2,RABEP2,TIMP1,IBRDC3,WNT4,LYPLA2,PCYT2,ACADS,TNFRSF1A,PIGT,AP1B1	18	TRUB1	1		hsa-miR-22	BCL9L	1	RGS14,IGFBP4,ARNTL,BCL9L,PTPRT	5	RGS14,SRF,BCL9L	3		hsa-miR-22	FOSL1,CTDSP1,MAX,NEUROD1	4	MXI1,CEBPD,MAX,CREB3L3,RELA,POU2F1,ARNTL,ARID5A,TP53	9	NFAT5,CEBPD,MAX,SMAD4,ASCL1,MYCL1,TP53,FOXP1	8
hsa-miR-183	PSEN2,DGCR2,NRXN3,PFN2,SAFB,GATAD2B	6	FLNA,ATP6V0D1,PEMT,SIGIRR,EEF2,CAPN1,PSEN2,ZGPAT,LYPLA2,SF4,CSDA,PPP1R14B,ECEL1,AP2S1,SIL1	15	PSEN2,DGCR2,PFN2,SAFB,GATAD2B,EEF2	6		hsa-miR-183	RHOB	1	RGS14,EFNA1,DDIT3,RALGDS,HTRA3	5	RHOB,FREQ	2		hsa-miR-183	TCF12,SOX6,CTDSP1,CTDSPL,FOXP1	5	NFRKB,THRA,CSDA,MAX,MYOG,FOXP1,CCNDBP1	7	TCF12,CTDSP1,TCF4,SMAD4,CTDSPL,FOXP1	6
hsa-miR-29a	ARVCF,CAMK2G,TNFRSF1A,ABHD4,CSDA,KCTD5,SYT7,BAIAP2	8	DRAP1,GLP1R,NRXN3,DDX49,SMARCB1,ARVCF,SERPINA4,TNFRSF1A,CSDA,CRELD1,MRPL46,WDR18	12	MAFG,ARVCF,PIAS4,CAMK2G,TNFRSF1A,KCTD5,ABHD4,CSDA,SYT7,BAIAP2,DEDD	11		hsa-miR-29a	FBXW9,CORO6,RERE,BTG2	4	CACNA1C,FBXW9,CORO6,ARNTL,HNRPL,NDN	6	FBXW9,CORO6,RERE,FBXL11,BCL9L,BTG2	6		hsa-miR-29a	MXI1,ISL1,PPARD,NFAT5,LASP1,E2F7,HBP1,MORF4L1,CSDA	9	ISL1,MTA2,ATF2,HBP1,SLC4A8,CSDA,ARNTL,TP53,CCNDBP1	9	ISL1,PPARD,NFAT5,LASP1,CSDA,E2F7,HBP1	7
hsa-miR-182	SCRT1,VAT1,MYO1C,MEF2D,ARHGDIA,DGCR2,ACVR1,SLC25A1	8	PNPLA2,CAMK2N1,LMAN2,GNAI2,RFNG,SLC29A2,CAPN1	7	VAT1,TRPC4AP,TRIB3,MYO1C,CAMK2N1,MEF2D,ARHGDIA,DGCR2,ACVR1,SFXN5	10		hsa-miR-182	RERE,DOK4,LMNA,XPR1	4	DOK4	1	DOK4,RALGDS,XPR1	3		hsa-miR-182	SMAD1,ISL1,SOX6,CTDSP1,HBP1,MORF4L1,FOXK2,PBX2,NKX2-2,CTDSPL,ZHX1	11	ATF1,ISL1,CREB3L1,NKX2-2,LITAF,SMAD4	6	SMAD1,CREB3L1,CTDSP1,EBF1,MYT1L,TCF19,FOXK2,BHLHB3,FOSL2,CTDSPL,ZHX1,ISL1,SOX6,NRF1,MORF4L1,PBX2,NKX2-2,PAX6	18
hsa-miR-320	TRAF7,ARF1,RHOG	3	ATP2A3,IFRD2,FKBP8,SMARCD2,RHOG,BCKDK,DCTN2,AGPAT1,MARK2,ECH1,PIGT,PPP1R14B,DCTN1	13				hsa-miR-320	SRF,ARNTL	2	VIM,CYGB	2				hsa-miR-320	NR3C2,RFX1,PBX3,MXI1,CTNNB1,ARNTL	6	CTDSP1,CTNNB1,PDLIM1,RARA,SBNO1	5
hsa-miR-29b	ARVCF,CAMK2G,TNFRSF1A,ABHD4,CSDA,KCTD5,SYT7,BAIAP2	8	NRXN3,SMARCB1,ARVCF,PIAS4,SERPINA4,TNFRSF1A,CSDA,WDR18,RPUSD1	9	MAFG,ARVCF,PIAS4,CAMK2G,TNFRSF1A,KCTD5,ABHD4,CSDA,SYT7,BAIAP2,DEDD	11		hsa-miR-29b	FBXW9,CORO6,RERE,BTG2	4	CACNA1C,FBXW9,ARNTL,HNRPL,SCTR	5	FBXW9,CORO6,RERE,FBXL11,BCL9L,BTG2	6		hsa-miR-29b	MXI1,ISL1,PPARD,NFAT5,LASP1,E2F7,HBP1,MORF4L1,CSDA	9	ISL1,MTA2,DEAF1,ATF2,HBP1,SLC4A8,CSDA,ARNTL,PHTF1,CCNDBP1	10	ISL1,PPARD,NFAT5,LASP1,CSDA,E2F7,HBP1	7
hsa-miR-337-5p			DRAP1,RAB25,IFRD2,SSU72,MYBBP1A,AK1,MRPL12,MRPL18,MAD2L2,PUS1,CDC34,CLPTM1,PSEN2,EMILIN2,LMAN2,DNM2	16				hsa-miR-337-5p			RTN1,WDR20,ARNTL,BRUNOL4	4				hsa-miR-337-5p			FOXA2,RFX1,PKNOX1,ARNTL	4
hsa-miR-29b-2*			VGF,REEP4,G0S2,SHARPIN,SIL1	5				hsa-miR-29b-2*			DOCK6	1				hsa-miR-29b-2*			FBLIM1,POU2F1,PHTF1	3
hsa-miR-380*			FLNA,IFRD2,ALKBH5,ARHGAP8	4				hsa-miR-380*			RTN1,FEV	2				hsa-miR-380*			ELF3	1
hsa-miR-129-5p			NPDC1,PUS1,GRINA,FKBP8,VCP,PSEN2,ARHGAP8,COMT,PERQ1,CRELD1,ENTPD2	11	CAMK2N1,PLEKHH3,SEC61A1,GHR,MAFG,SYT7,VCP	7		hsa-miR-129-5p			VIM	1	CACNA1C,RERE,ZFP36L2,FBXL11,LMNA,BRUNOL4	6		hsa-miR-129-5p			MXI1,VPS72,MAX,EPHA1,CREB3L3,TCF4,FHL2,PHTF1	8	NR3C2,PKNOX1,ISL1,E2F7,SOX4,EBF1,ETV5,TCF20,TRPS1,ETS1,MYT1L,PBX3,FOXP4,TCF4,PAX6	15
hsa-miR-655			AKT1,CIB1,IAPP,IBRDC3,HAGH,GAS6,NEUROD1,SRP68,ADM	9	ADM	1		hsa-miR-655			SMPDL3A,WDR20	2	SRF,CACNA1C,RTN1,WDR20	4		hsa-miR-655			TCF4,NEUROD1,SMAD4,ASCL1,ATF2,RARA,SBNO1	7	NR3C2,SMAD5,E2F7,SOX4,EBF1,ASCL1,TRPS1,NCOA2,PBX3,TCF4,PAX6	11
hsa-miR-369-3p	MEF2D	1	SRM,CIB1,HAGH,GAS6,NEUROD1	5	GATAD2B	1		hsa-miR-369-3p	RGS14,WDR20	2	SMPDL3A,WDR20,SERTAD1,KLF10,LRP1,SST	6	SEC23A,RGS14,CACNA1C,PPP1R3F,WDR20,LRP1	6		hsa-miR-369-3p	CREB3L1,MYT1,SOX4,YBX1,TRPS1,TCF12,FOXJ3,NKX2-2	8	TCF4,NEUROD1,ATF2,MYC,PDLIM3	5	SOX4,EBF1,ASCL1,ETV5,TRPS1,MYT1L,TCF4,PAX6,FOXP1	9
hsa-miR-26a	REEP4,ADM,ADRBK1,ARF1	4	WHSC2,REEP4,PAOX,ADM,CDC34	5	REEP4,MAEA,ADM	3		hsa-miR-26a	CACNA1C,RTN1,EPHA2,KLF10,BCL9L	5	ZFP36L2,EPHA2,CALCOCO1,MICAL3,PLEKHC1	5	CACNA1C,RTN1,EPHA2,MICAL3	4		hsa-miR-26a	TCF12,SMAD1,MXI1,HOXA5,E2F7,SMAD4,BBX,ATF2,TRPS1	9	SMAD1,MXI1,SLC4A8,VPS72,HOXA5	5	SMAD1,MXI1,FOXJ3,HOXA5,E2F7,CREBL2,SMAD4,ATF2,TRPS1	9
hsa-miR-324-3p	GLP1R,TRAF7,DGCR2,PPM1G,EIF4G1	5	MAN2B1,TRAF7,SSNA1,IFRD2,GPX4,PPP5C,ZBTB7B,VCP,THOP1,PAOX,ENTPD2,CIB1,JTB,MYH14,NAPA,ECEL1,DDX49,MYBBP1A,WHSC2,MARK2,ADRBK1,GYLTL1B,ATP6V0D1,MAD2L2,GRINA,FKBP8,CLPTM1,SLC29A2,DPEP1,ARVCF,EGLN2,LYPLA2,ARL6IP4,PDX1,FZR1,PTGES2	36	KLC2,IGF2,WDR23,FKBP8,GATAD2B,ITGA3,ZBTB7B,MEF2D,GNAI2,ECEL1	10		hsa-miR-324-3p	RGS14,SRF	2	SEPW1,GADD45B,CYGB,LMNA,SURF6,HTRA3,RGS14,EFNA1,FBXW9,SCTR	10	RGS14,FBXL11	2		hsa-miR-324-3p	PBX2,DMTF1	2	MXI1,OLIG1,POU3F4,CUTL1,APBB1,HBP1	6	CTDSP1,SREBF2,PBX2,PHC2,HBP1	5
hsa-miR-376a*			SBF1	1				hsa-miR-376a*			PDZK1IP1,SEPW1,GADD45B,DOCK6,WDR20,SERTAD1	6				hsa-miR-376a*
hsa-miR-154			ATPBD1B,TRIP10,B3GAT3,LMAN2,PUS1,MAEA,GPX4,MYO1C	8	GNAI2,UBE2D2	2		hsa-miR-154			VIM	1	E2F5,JAM3	2		hsa-miR-154			NCOR1,FHL1,BBX,MYC	4	TCF12,NRF1	2
hsa-miR-30c	VAT1,NRXN3,PFN2,NEUROD1,SMARCD2,UBE2D2,RASD1,PSEN2,TBC1D10B,GOT2,KCTD5,ACVR1,CSDA,GNAI2,SBF1	15	TRIB3,NEUROD1,VCP,RASD1,VGF,NTHL1,TBC1D10B,KCTD5,MRPL18,SMARCD2,CLTB,C1QL1,SERPINA4,ACVR1,CSDA,GNAI2,PTGES2	17	PFN2,NEUROD1,RASD1,TBC1D10B,GOT2,KCTD5,SBF1,VAT1,NRXN3,SMARCD2,MAFG,RAB4B,UBE2D2,MEF2D,CAMK2N1,ACVR1,GNAI2,AP1B1,SDAD1	19		hsa-miR-30c	SEC23A,RHOB,VIM,KLF10,XPR1	5	CACNA1C,RHOB,BTG2	3	SEC23A,CACNA1C,RHOB,KLF10,RALGDS,FREQ,XPR1,HTRA3	8		hsa-miR-30c	GMEB2,SMAD1,NR3C2,NFAT5,E2F7,JUNB,NEUROD1,SOX4,YBX1,ZBTB7A,TRPS1,FOXP4,CSDA,NKX2-2,DMTF1	15	USF1,CFDP1,NKX2-2,CSDA,NEUROD1,PHTF1	6	SMAD2,GMEB2,SMAD1,NR3C2,ATF1,NFAT5,E2F7,NEUROD1,SOX4,ZBTB7A,TRPS1,FOXP4,NKX2-2	13
hsa-miR-770-5p			IGF2,CAPN1,WHSC2,PAOX,PPM1G,ENTPD2,FASTK,B3GAT3,CDC34,EGLN2,DGAT1,LYPLA2,ARL6IP4,ACADS,SERPINA4,PIGT	16	GATAD2B	1		hsa-miR-770-5p			CACNA1C,FBXW9,IGFBP2,MESDC1	4	MESDC1	1		hsa-miR-770-5p			ELF3,RFX3,PDLIM7,JUNB,FOXP1,RARA	6	DLX3,TRPS1,RARA	3
hsa-miR-493*			SRM,IGF2,GSK3A	3				hsa-miR-493*								hsa-miR-493*			SLC4A8,GTF2IRD1	2
hsa-miR-145	DDR1	1	NPDC1,B3GAT3,ERP29,CCL20,LYPLA2,PERQ1,PPM1G,GYLTL1B,SCYL1,SIL1	10	CFTR	1		hsa-miR-145	RIN2	1	GCG,EFNA1,PDZK1IP1,IGFBP2,PPP1R3F,SCTR,IRF7	7	EFNA1,MICAL3	2		hsa-miR-145	SMAD3,JUNB	2	ATF1,ERF,RARA,POU2F1,PBX2,ARID5A,IRF7,CCNDBP1	8	ATF1,SMAD5,LASP1,ERF,EBF1,ETS1,SMAD3,PBX3,TCF4,SMAD4	10
hsa-miR-29c	ARVCF,CAMK2G,TNFRSF1A,ABHD4,CSDA,KCTD5,SYT7,BAIAP2	8	DRAP1,NRXN3,DDX49,MYH14,SMARCB1,ARVCF,SERPINA4,TNFRSF1A,CSDA,CRELD1,MRPL46,WDR18	12	MAFG,ARVCF,PIAS4,CAMK2G,TNFRSF1A,KCTD5,ABHD4,CSDA,SYT7,BAIAP2,DEDD	11		hsa-miR-29c	FBXW9,CORO6,RERE,BTG2	4	CACNA1C,FBXW9,CORO6,ARNTL,HNRPL,PLEKHC1	6	FBXW9,CORO6,RERE,FBXL11,BCL9L,BTG2	6		hsa-miR-29c	MXI1,ISL1,PPARD,NFAT5,LASP1,E2F7,HBP1,MORF4L1,CSDA	9	ISL1,MTA2,HBP1,SLC4A8,CSDA,ARNTL,TP53,PHTF1,CCNDBP1	9	ISL1,PPARD,NFAT5,LASP1,CSDA,E2F7,HBP1	7
hsa-miR-183*			PLEKHH3,IBRDC3,GYLTL1B	3				hsa-miR-183*			DOCK6,E2F5,WDR20	3				hsa-miR-183*			HOXA5,GTF2IRD1,LPXN,ATF2,FHL2	5
hsa-miR-148b	KLC2,ACVR1,USP32,DEDD	4	ATP6V0D1,B3GAT3,SSU72,PCNXL3,STXBP2,THOP1,PNPLA2,WHSC2,MIF,BAIAP2,ECEL1,DEDD,ENTPD2,VPS18	14	NEUROD1,MAFG,GATAD2B,FLOT2,ACVR1,USP32,SLC7A5,DEDD	8		hsa-miR-148b	DOCK6,WDR20	2	DOCK6,KLC3,ARNTL,SCTR,LMNA	5	DOCK6,WDR20,FREQ	3		hsa-miR-148b	LIMD2,FOXK2,NFAT5,MAX,E2F7,RORB,ZBTB7A,TRPS1	8	USF1,VPS72,HOXA5,ARNTL,CREB3L3,APBB1,TRPS1	7	SMAD2,USF1,LIMD2,MTA2,PPARD,NFAT5,E2F7,NEUROD1,ZBTB7A,TRPS1,FOXK2,BHLHB3	12
hsa-miR-340			CCL20,ECH1	2	IRF2BP1,NEUROD1,MAFG,ICMT,ADRBK1,MYO1C	6		hsa-miR-340			HNRPL,NDN	2	RERE,JAM3,CMTM6,KLF10	4		hsa-miR-340	CTNNB1	1	THRA,FHL2,FHL3,NFE2L2	4	PKNOX1,ATF1,NFAT5,E2F7,NEUROD1,MYT1L,BHLHB3,DLX3,FHL2,SMAD2,NFKB1,ETV5,ASCL1,TCF4,SMAD4,FOXP1	16
hsa-miR-493			NUCB1,IFRD2,PUS1,DDX49,RNF25,CDK10,TEX264,AP1S1,PIAS4,THOP1,WHSC2,RANGAP1,TNFRSF1A	13				hsa-miR-493			PKIG,SPHK1,NR1D1,CALCOCO1,LTB	5	XPR1	1		hsa-miR-493			LMO2,NCOR1,RXRG,NKX2-2,PBX2,HOXA5,PDLIM7,FHL2,RARA	9
hsa-miR-628-5p			ATP13A1,PPP5C,AGTRAP,CAMK2G,TBC1D10B,NAPA,HDAC3,MRPL18	8	CAMK2G,ACVR1,ICMT	3		hsa-miR-628-5p			CYB5R3,PDZK1IP1,WDR20,VIM	4				hsa-miR-628-5p			SLC4A8,LIMD2,PDLIM1,BBX	4	LIMD2,TCF4	2
hsa-miR-103	KLC2,G0S2,VAT1,SMARCD2,CSNK1G2,FLOT2,EGLN2,ARHGDIA,LYPLA2,TRIP10,GHR,CRELD1,DEDD	13	FLNA,ATP6V0D1,MAD2L2,SSU72,NFKB2,IRF2BP1,SIGIRR,PNPLA2,SRM,CREB3,REEP4,PCYT2,PAOX,BAIAP2	14	CSNK1G2,POLDIP2,VCP,FLOT2,MEF2D,WNT4,CAMK2G,AGPAT1,CRELD1	9		hsa-miR-103	BCL9L,LTB,LRP1,BTG2	4	BCAM,ARNTL,PTPRT	3	SDCBP,CACNA1C,LRP1,BTG2	4		hsa-miR-103	PBX3,SMAD5,NFAT5,E2F7,DMTF1,EPHA1,ZHX1	7	CTDSP1,NFRKB,NRF1,ARNTL,EPHA1,CREB3L3	6	FOXJ3,EBF1,FOXP1	3
hsa-miR-374b			ZBTB7B,EIF4G1	2	AKT1,MEF2D,NEUROD1,TRUB1	4		hsa-miR-374b			RGS14,SMPDL3A,PPP1R3F	3	RGS14,PPP1R3F,WDR20	3		hsa-miR-374b			VPS72,TCF4,ATF2,MYC,HBP1,PHTF1,NFE2L2	7	PKNOX1,ISL1,NEUROD1,SOX4,ASCL1,MYT1L,NKX2-2,TCF4,PAX6,FOXP1	10
hsa-miR-30e			NEUROD1,SMARCD2,VCP,RASD1,NTHL1,C1QL1,GRN,KCTD5,CSDA,ACVR1,GNAI2,SDAD1,MRPL18	13	PFN2,NEUROD1,RASD1,TBC1D10B,GOT2,KCTD5,SBF1,VAT1,NRXN3,SMARCD2,MAFG,RAB4B,UBE2D2,MEF2D,CAMK2N1,ACVR1,GNAI2,AP1B1,SDAD1	19		hsa-miR-30e			SEC23A,CACNA1C,RHOB,CYGB	4	SEC23A,CACNA1C,RHOB,KLF10,RALGDS,FREQ,XPR1,HTRA3	8		hsa-miR-30e			USF1,CFDP1,CSDA,HOXA5,NEUROD1,PHTF1	6	SMAD2,GMEB2,SMAD1,NR3C2,ATF1,NFAT5,E2F7,NEUROD1,SOX4,ZBTB7A,TRPS1,FOXP4,NKX2-2	13
hsa-miR-149	BAIAP2	1	SIRT2,TEX264,PARVB,CSNK1G2,PPP5C,TBC1D10B,PLCB3,BIN1,MARK2,MAD2L2,B3GAT3,PSMD3,SLC29A2,DAPK3,ACADS,PLEKHJ1,AP1B1,PTGES2	18	WNT4,AGPAT1,ABHD4,SYT7,POLDIP2	5		hsa-miR-149	SEC23A,SRF,BCL9L,BTG2,XPR1	5	BGN,IGFBP2,SPHK1,RALGDS	4	SRF,CACNA1C	2		hsa-miR-149	FOSL1,TCF12,RORB,CREBL2,MYCL1	5	USF1,PPARD,CREB3L3	3	SMAD2,NFAT5,CREBL2,CTDSPL	4
hsa-miR-30d	VAT1,NRXN3,PFN2,NEUROD1,SMARCD2,UBE2D2,RASD1,PSEN2,TBC1D10B,GOT2,KCTD5,ACVR1,CSDA,GNAI2,SBF1	15	NEUROD1,VCP,VGF,NTHL1,TBC1D10B,KCTD5,SBF1,MRPL18,SMARCD2,CAMK2N1,C1QL1,ACVR1,CSDA,GNAI2,PTGES2,SDAD1	16	PFN2,NEUROD1,RASD1,TBC1D10B,GOT2,KCTD5,SBF1,VAT1,NRXN3,SMARCD2,MAFG,RAB4B,UBE2D2,MEF2D,CAMK2N1,ACVR1,GNAI2,AP1B1,SDAD1	19		hsa-miR-30d	SEC23A,RHOB,VIM,KLF10,XPR1	5	SLC12A7,CYGB	2	SEC23A,CACNA1C,RHOB,KLF10,RALGDS,FREQ,XPR1,HTRA3	8		hsa-miR-30d	GMEB2,SMAD1,NR3C2,NFAT5,E2F7,JUNB,NEUROD1,SOX4,YBX1,ZBTB7A,TRPS1,FOXP4,CSDA,NKX2-2,DMTF1	15	CFDP1,CSDA,HOXA5,NEUROD1,PHTF1	5	SMAD2,GMEB2,SMAD1,NR3C2,ATF1,NFAT5,E2F7,NEUROD1,SOX4,ZBTB7A,TRPS1,FOXP4,NKX2-2	13
hsa-miR-130b	KLC2,FASTK,NEUROD1,SMARCD2,UBE2D2,RASD1,FLOT2,ACVR1,DNM2,USP32,DEDD	11	FASTK,CIB1,ATP6V0D1,G0S2,PUS1,GRINA,SMARCD2,THOP1,ACVR1,PPAN,ECEL1	11	FASTK,NEUROD1,MAFG,SMARCD2,GATAD2B,UBE2D2,ZBTB7B,RASD1,ACVR1,DNM2,USP32	11		hsa-miR-130b	RTN1,DOCK6,WDR20	3	GADD45B,WDR20,STK3,BICC1	4	RTN1,FBXL11,WDR20	3		hsa-miR-130b	NR3C2,LIMD2,SMAD5,MYT1,MAX,E2F7,NEUROD1,SOX4,HBP1,TRPS1,HOXA5,RORB	12	XBP1,VPS72,HOXA5,CCNDBP1	4	LIMD2,MYT1,E2F7,NEUROD1,SOX4,HBP1,MYT1L,FOSL1,HOXA5,BHLHB3,NR3C2,SMAD5,TRPS1,TCF4,SMAD4,FOXP1	16
hsa-miR-337-3p			VAT1,PUS1,DDX49,CDK10,SCARF2,CLPTM1,SMARCB1,DDR1,AP1S1,SEC61A1,MAEA	11	CAMK2G,MYO1C	2		hsa-miR-337-3p			GCG,UBE2B,VIM,NDN,LTB,SCTR	6				hsa-miR-337-3p			LMO2,FOXP1	2	RORB,TCF4,TRPS1	3
hsa-miR-134			KLC2,FASTK,PIN1,PARVB,SIGIRR,PNPLA2,PSEN2,LYPLA2,NPLOC4,NAPA,SHARPIN,MRPL18	12				hsa-miR-134	BCL9L	1	SDCBP,CYB5R3,PDZK1IP1,TM4SF4,LTB	5				hsa-miR-134	NRF1	1	NRF1,IRF3,MYC	3
hsa-miR-99b	ICMT	1	DDX49,ITGA3,ZBTB7B,WHSC2,BIN1,MARK2,SHARPIN,ATP6V0D1,TRPC4AP,CLPTM1,DAPK3,REEP4,GAA,ECEL1,PTGES2,PIGQ	16	ICMT	1		hsa-miR-99b			PKIG,CRP,ARNTL	3				hsa-miR-99b	CTDSPL	1	TCF19,CFDP1,ARNTL,DLX3,NUCB2,FHL3	6	ZBTB7A,CTDSPL	2
hsa-miR-7	SCRT1,TBC1D10B,PFN2,GATAD2B,UBE2D2	5	POLR2E,FLNA,GRINA,JTB,ATPBD1B,SLC4A2,BIN1,NPLOC4	8	PFN2,MAFG,GATAD2B	3		hsa-miR-7	SRF	1	SEPW1,CRP,PARD6A,SCTR	4				hsa-miR-7	TCF12	1	POU2F1,NKX2-2,FHL2,PAX6,RELA	5	TCF12,PBX3,TCF4,PAX6	4
hsa-miR-99a	ICMT	1	ITGA3,ZBTB7B,WHSC2,REEP4,DAPK3,PAOX,DCTN2,NPLOC4,ECEL1,SHARPIN,RPUSD1,PIGQ	12	ICMT	1		hsa-miR-99a			DRD1IP,IGFBP2,PKIG,CRP,ARNTL,BTG2	6				hsa-miR-99a	CTDSPL	1	TCF19,POU2F1,FHL1,ARNTL,DLX3,FHL3	6	ZBTB7A,CTDSPL	2
hsa-miR-411*			WHSC2,SRM,PFN2,ARHGEF1	4				hsa-miR-411*			RTN1,CRP	2				hsa-miR-411*
hsa-miR-328	VAT1,AGPAT1,MARK2,MYO1C	4	IFRD2,GSK3A,SSU72,NFKB2,TEX264,CSNK1G2,PPP5C,ZBTB7B,SIGIRR,CLCN7,TIMM17B,PAOX,PLCB3,MARK2,SHARPIN,RPUSD1,COASY,RABEP2,SMARCB1,ARHGEF1,MYO1C,SLC29A2,SERPINA4,PDX1,ECEL1,PTGES2	26				hsa-miR-328	SRF	1	PKIG,SCTR,MESDC1	3	BCL9L	1		hsa-miR-328	CTDSP1,PBX2,MAX,PHC2	4	NFIC,JUNB,ERF,EPHA1,CREB3L3,RARA	6	MYOG	1
hsa-miR-551b			ATP6V0D1,MAD2L2,CDK10,SCARF2,MRPL11,EGLN2,DNM2,ACTR1B,ENTPD2,AP2S1	10				hsa-miR-551b			CACNA1C,PDZK1IP1,PKIG,PPP1R3F,SPHK1,CRP,KIFC3	7				hsa-miR-551b			FOXA2,APBB1	2
hsa-miR-671-3p			NPDC1,SIRT2,DDX49,RNF25,ARF1,ATPBD1B,RANGAP1,ARHGAP8,GYLTL1B,RABEP2,B3GAT3,NRXN3,PSMD3,APH1A,SMARCB1,C1QL1,GAS6	17				hsa-miR-671-3p			GCG,IGFBP2,GADD45B,EPHA2,PPP1R3F,SERTAD1,CALCOCO1,KIFC3	8	CACNA1C,XPR1	2		hsa-miR-671-3p			NFKB1,WTIP,MAX,DEAF1,APBB1,NKX2-2,TGFB1I1,PHTF1	8
hsa-miR-369-5p			MAD2L2,LYPLA2,GSK3A,CCL20,ARFRP1	5				hsa-miR-369-5p			GADD45B,KLC3,WDR20,IRF7,BRUNOL4,HTRA3	6				hsa-miR-369-5p			CFDP1,MAX,CUTL1,ATF2,TCF20,IRF7,ETS1	7
hsa-miR-296-5p			PIN1,SSNA1,IFRD2,ITGA3,PPP5C,ZBTB7B,ENTPD2,POLR2E,FASTK,FLNA,RABEP2,TRPC4AP,SMARCB1,MEF2D,CREB3,TNFRSF1A,GAS6,DNM2,ECEL1,HGS,SIGIRR,VGF,GRN,TIMM17B,PLCB3,BIN1,PPP1R14B,PPAN,GYLTL1B,RPUSD1,ADRBK1,COASY,MAD2L2,TOR2A,FKBP8,CLTB,ARHGEF1,LYPLA2,SERPINA4,GAA,SLC4A2,PDX1,PTGES2,HDAC3	44	MEF2D,LYPLA2,FKBP8,RAB4B,ADRBK1,EEF2	6		hsa-miR-296-5p			DRD1IP,PKIG,KLC3,CYGB,LTB,HTRA3	6	SRF,CYGB	2		hsa-miR-296-5p			ELF3,RFX1,CTDSP1,WTIP,IRF3,DEAF1,FHL3,RARA,PBX2,ARID5A	10	FOXP4,CTDSP1	2
hsa-let-7a	MEF2D,GHR,TIMM17B,CAMK2G,SYT7,USP32,CDC34	7	PEMT,PCNXL3,TEX264,JOSD2,AP1S1,PIAS4,WHSC2,TRIP10,ARHGAP8,TIMM17B,TST,AP2S1,FLNA,CDK10,CDC34,RHOG,BCKDK,LYPLA2,DCTN1	19	B3GAT3,CDC34,AP1S1,MEF2D,EGLN2,GHR,TIMM17B,ICMT,SYT7,USP32	10		hsa-let-7a	E2F5,MESDC1,BTG2	3	PKIG,NR1D1,MESDC1	3	INSR,E2F5,MESDC1,BTG2	4		hsa-let-7a	TEF,PBX3,LIMD2,PBX2	4	NR1H4,PDLIM7,EPHA1,MYC	4	SMAD2,PBX3,LIMD2,CEBPD,PBX2,MYCL1,TP53,FOXP1	8
hsa-miR-15a*			SSNA1,IFRD2,PEMT,ARFRP1,TEX264,GPX4,THOP1,AK1,P4HB,SLC25A1,FASTK,MAD2L2,ARHGEF1,CREB3,EGLN2,PNPLA2,HGS	17				hsa-miR-15a*			PPP1R3F,CALCOCO1,KIFC3,SCTR	4				hsa-miR-15a*			NFRKB,MAX,VAX2	3
hsa-miR-93*			ARFGAP1,PIN1,TOR2A,NFKB2,RNF25,PARVB,ZBTB7B,AGTRAP,CREB3,PAOX,PPM1G,PIGQ	12				hsa-miR-93*			SEPW1,PPP1R3F,SPHK1	3				hsa-miR-93*			SMAD3,USF1,ATF1,THRA	4
hsa-miR-26b	REEP4,ADM,ADRBK1,ARF1	4	REEP4,ADM,CDC34	3	REEP4,MAEA,ADM	3		hsa-miR-26b	CACNA1C,RTN1,EPHA2,KLF10,BCL9L	5	RTN1,GADD45B,EPHA2,MICAL3,PLEKHC1	5	CACNA1C,RTN1,EPHA2,MICAL3	4		hsa-miR-26b	TCF12,SMAD1,MXI1,HOXA5,E2F7,SMAD4,BBX,ATF2,TRPS1	9	MXI1,SLC4A8,VPS72,HOXA5,CREBL2	5	SMAD1,MXI1,FOXJ3,HOXA5,E2F7,CREBL2,SMAD4,ATF2,TRPS1	9
hsa-miR-429			ATPBD1B,PIN1,CIB1,LYPLA2	4	MEF2D,PIN1,LYPLA2,ARHGDIA,MAFG,GATAD2B,SBF1,DNAJC5	8		hsa-miR-429			UBE2B,SEC23A,EFNA1,KLF10,NDN,LRP1,SST	7	SEC23A,SRF,NDN,FREQ,UBE2B,EFNA1,CACNA1C,LRP1	8		hsa-miR-429			CRIP2,PDLIM1,HOXA5,MYC	4	SMAD2,MYT1,ETV5,NCOA2,ETS1,PBX3,HOXA5,TCF4,FOXP1	9
hsa-miR-301a			FASTK,ATP6V0D1,G0S2,PFN2,JTB,STXBP2,THOP1,DGCR2,DCTN2,ACVR1,MARK2,MRPL18	12	FASTK,NEUROD1,MAFG,SMARCD2,GATAD2B,UBE2D2,ZBTB7B,RASD1,ACVR1,DNM2,USP32	11		hsa-miR-301a			UBE2B,WDR20,HNRPL,SST	4	RTN1,FBXL11,WDR20	3		hsa-miR-301a			HOXA5,ASCL1,NFE2L2	3	LIMD2,MYT1,E2F7,NEUROD1,SOX4,HBP1,MYT1L,FOSL1,HOXA5,BHLHB3,NR3C2,SMAD5,TRPS1,TCF4,SMAD4,FOXP1	16
hsa-miR-216b			ATP2A3,CAMK2G,IBRDC3,MARK2,SHARPIN,HDAC3,EEF2	7	GATAD2B	1		hsa-miR-216b			SDCBP,SEPW1,DDIT3	3				hsa-miR-216b			USF1,MAX,CUTL1,CCNDBP1	4	SMAD3,TCF4,EBF1	3
hsa-miR-200b*			NUCB1,PNPLA2,MAD2L2,GSK3A,TOR2A,GAS6,RFNG	7				hsa-miR-200b*			PTPRT,LRP1	2				hsa-miR-200b*			XBP1,RXRG,PHTF1,ZHX1	4
hsa-miR-654-3p			PIN1,RAB25,IFRD2,HAGH,CDK10,ATPBD1B,WNT4,SEC61A1,DAPK3,AGPAT1,CRELD1,ECEL1	12	MAFG	1		hsa-miR-654-3p			PKIG,SCTR	2				hsa-miR-654-3p			USF1,APBB1,PHTF1	3	CTDSPL	1
hsa-miR-139-5p			SF4,PERQ1,MRPS12,SDAD1	4	KLC2,GOT2,ITGA3	3		hsa-miR-139-5p			DOCK6,SCTR	2				hsa-miR-139-5p			ATF4,PBX3,LMO2,RORB,ARID5A,BBX	6	TCF12,NFAT5,TCF4,EBF1,FOXP1,ETS1	6
hsa-miR-7-2*			SSU72,GRINA,CLPTM1,SMARCB1,PLEKHH3,SNRP70,WFS1,DCTN1,DEDD	9				hsa-miR-7-2*			DOK4,NR1D1,BICC1	3				hsa-miR-7-2*
hsa-miR-186	PPM1G,ICMT,GATAD2B,ITGA3	4	MPG,PUS1,MARK2,APH1A,PPM1G,POLDIP2	6	WNT4,TRAF7,SEC61A1,HYOU1,MAFG,USF2,ICMT	7		hsa-miR-186	UBE2B,RHOB,NDN	3	SMPDL3A,CRP,LRP1	3	UBE2B,SRF,RERE	3		hsa-miR-186	NR3C2,TEF,MAX,TCF20,TRPS1,NCOA2,ZHX1	7	IFT57,PDLIM3	2	MYT1L,FOXK2,MYT1,POU3F4,NFAT5,WTIP,TCF20	7
hsa-miR-654-5p			RAB25,CSNK1G2,PPP5C,THOP1,SRM,MRPL12,SF4,PPM1G,MIF,BAIAP2,SHARPIN,FLNA,ATP6V0D1,ATP13A1,GRINA,PUS1,MYH14,DDR1,CDC34,ARHGEF1,DPEP1,EEF2,MYO1C,BCKDK,C1QL1,ZGPAT,ARHGDIA,DGAT1,CRELD1,PDX1	30	ITGA3,ADRBK1	2		hsa-miR-654-5p			CYB5R3,FBXW9,DRD1IP,DOCK6,PPP1R3F,IRF7,LRP1	7				hsa-miR-654-5p			PBX3,RFX3,CRIP2,MAX,PDLIM7,BBX,IRF7	7
hsa-miR-191			VGF,SRM,SF4,TRPC4AP,SAFB,CDC34,VCP,MPDU1	8				hsa-miR-191	LTB	1	INSR,CXCL1,ARNTL,CALCOCO1	4				hsa-miR-191	JUND	1	MORF4L1,VPS72,NKX2-2,NFRKB,ARNTL,NCOA2	6	SOX4	1
hsa-miR-375	USP32,RASD1	2	MPG,RASD1,NTHL1,DAPK3,MRPL12,PCYT2,SLC4A2,LMAN2,SERPINA4,BIN1,MAEA,ENTPD2,RPUSD1,TCF1	14	RASD1	1		hsa-miR-375	XPR1	1	SLC12A7,CACNA1C,PKIG,LRP1	4	SEC23A,ZFP36L2	2		hsa-miR-375	TCF12,JUND,MXI1,YBX1,TRPS1	5	LASP1,YBX1,TCF20,TP53,NFE2L2,PHTF1,VAX2,TCF1	8	JUND,SOX6,ASCL1,PAX6,TRPS1	5
hsa-miR-16	KLC2,G0S2,VAT1,SMARCD2,EGLN2,ARHGDIA,LYPLA2,TRIP10,GHR,USP32,DEDD	11	NUCB1,MAD2L2,G0S2,B3GAT3,GPS1,PEMT,SSU72,WHSC2,LYPLA2,GOT2,BIN1,ADM,ECEL1,GYLTL1B,PLEKHJ1,VPS18	16	CYBASC3,G0S2,VAT1,IRF2BP1,RAB4B,MYO1C,EGLN2,WNT4,ARHGDIA,LYPLA2,TRIP10,GHR,BAIAP2,GYLTL1B,DEDD	15		hsa-miR-16	BCL9L,LTB,BTG2	3	FBXW9,DRD1IP,RTN1,CRP,RPL24,HNRPL,PLEKHC1	7	INSR,BCL9L,FREQ,BTG2,XPR1	5		hsa-miR-16	SMAD5,E2F7,EPHA1,SMAD3,FOSL1,PBX3,DMTF1,CTDSPL,ZHX1	9	NFKB1,EPHA1	2	SMAD5,LITAF,E2F7,EPHA1,SMAD3,MYT1L,FOSL1,NFIC,BHLHB3,DMTF1,CTDSPL,MAFK	12
hsa-miR-34a	VAT1,B3GAT3,APH1A,HCN3,SEC61A1,DGCR2,ALDOA,GNAI2,AP2S1	9	CYBASC3,PCNXL3,NFKB2,TEX264,JOSD2,MRPS12,MYBBP1A,HCN3,TIMM17B,ALDOA,PPP4C,AP2S1,MAD2L2,ATP13A1,GPS1,B3GAT3,PUS1,APH1A,PSMD3,BCKDK,ZGPAT,DGAT1,PTGES2	23	VAT1,GATAD2B,MYO1C,AGTRAP,FLOT2,HCN3,ALDOA,GNAI2	8		hsa-miR-34a	E2F5,NR1D1	2	NCBP2,GADD45B,NR1D1,LRP3,LMNA,RALGDS	6	E2F5,RALGDS	2		hsa-miR-34a	TCF12,LIMD2,SOX4,FOXP1	4	NR1I2,WTIP,IRF3,PDLIM7,FOSL1,XBP1,ARID5A,PHTF1	8	USF1,PKNOX1,LIMD2,CREB3L1,MTA2,SOX4,TCF12,FOSL1,SMAD4,FOXP1	10
hsa-miR-744			KLC2,GSK3A,STXBP2,GPX4,PPP5C,PIAS4,ATPBD1B,AK1,MRPL12,PAOX,PPP4C,FLNA,CIB1,DDR1,PNPLA2,REEP4,DGAT1,ECEL1,IGF2,ARFRP1,DDX49,MRPS12,RANGAP1,SRM,VGF,BIN1,SLC25A1,TIMP1,FKBP8,ARHGEF1,LYPLA2,ARL6IP4,PLEKHH3,ECH1,PDX1,PTGES2	36	KLC2	1		hsa-miR-744			BCAM,SLC12A7,DRD1IP,LMNA,HTRA3,FBXW9,LRP3,LRP1	8	LRP3	1		hsa-miR-744			PKNOX1,NFIC,RORA,PDLIM7,JUNB,PHC2,TGFB1I1,VAX2	8	JUNB	1
hsa-miR-7-1*			SNRP70,PLEKHH3,SSU72,CLPTM1,DEDD,SMARCB1,DCTN1	7				hsa-miR-7-1*			SPHK1,NR1D1,BICC1,PLEKHC1	4				hsa-miR-7-1*			NFE2L2	1
hsa-miR-200c	PIN1,LYPLA2,ARHGDIA,PFN2,SBF1	5	ATPBD1B,IFRD2,BIN1,TIMP1,PDX1	5	MEF2D,PIN1,LYPLA2,ARHGDIA,MAFG,GATAD2B,SBF1,DNAJC5	8		hsa-miR-200c	UBE2B,SEC23A,SRF,CACNA1C,EFNA1,KLF10,NDN	7	SEC23A,EFNA1,NDN	3	SEC23A,SRF,NDN,FREQ,UBE2B,EFNA1,CACNA1C,LRP1	8		hsa-miR-200c	MYT1,TRPS1,NCOA2,ETS1	4	CFDP1,CRIP2,PDLIM1,HOXA5,ETV5,MYC,FOXP1	7	SMAD2,MYT1,ETV5,NCOA2,ETS1,PBX3,HOXA5,TCF4,FOXP1	9
hsa-miR-25	MEF2D,GATAD2B,ADM	3	TRIP10,LYPLA2,GAA,C3,JTB,ADM	6	MEF2D,USF2,GATAD2B,ADM,ARF1	5		hsa-miR-25	BTG2	1	RPL24,WDR20	2	CACNA1C,BTG2,XPR1	3		hsa-miR-25	TEF,RFX1,NFAT5,NRF1,SOX4,FHL2	6	PBX3,LMO2,PDLIM1,NRF1,FHL2	5	TEF,RFX1,LMO2,NFAT5,NRF1,SOX4,FHL3,MYT1L,TCF4,FOSL2,MAFK	11
hsa-miR-301b			FASTK,ATP6V0D1,DGCR2,PFN2,STXBP2,THOP1	6	FASTK,NEUROD1,MAFG,SMARCD2,GATAD2B,UBE2D2,ZBTB7B,RASD1,ACVR1,DNM2,USP32	11		hsa-miR-301b			UBE2B,WDR20,HNRPL,SST	4	RTN1,FBXL11,WDR20	3		hsa-miR-301b			HOXA5,ASCL1,NFE2L2	3	LIMD2,MYT1,E2F7,NEUROD1,SOX4,HBP1,MYT1L,FOSL1,HOXA5,BHLHB3,NR3C2,SMAD5,TRPS1,TCF4,SMAD4,FOXP1	16
hsa-miR-597			NUCB1,ARFRP1,ZBTB7B,TIMM17B,GOT2,PLCB3,WDR18,AP2S1,SLC25A1,FLNA,GRINA,CDK10,DDR1,ARVCF,WNT4,CAMK2G,PDX1,NAPA	18	NRXN3	1		hsa-miR-597			PPP1R3F,FEV,DOK4	3				hsa-miR-597			ATF1,NR1I2,WTIP,MAX,TCF19,RFX3,THRA,FHL2,VAX2	9	MYT1L,FOXK2,CTNNB1	3
hsa-miR-339-3p			ARFGAP1,SIRT2,CSNK1G2,SERINC2,VCP,PTPRN,TBC1D10B,PPP4C,FLNA,MYH14,MPDU1,PSEN2,SNRP70,PIGT,MRPL46,PLEKHJ1,NUCB1,SSU72,DDX49,MRPS12,EXOSC7,SIGIRR,SRM,GRN,BIN1,BAIAP2,MAD2L2,TOR2A,CLTB,CLPTM1,DAPK3,CAMK2G,GNAI2	33				hsa-miR-339-3p			IGFBP2	1				hsa-miR-339-3p			NFKB1,ELF3,LMO2,CRIP2,NKX2-2,ARID5A,PHTF1,RELA	8
hsa-miR-92a			CYBASC3,EIF3S4,PIAS4,ALKBH5,LYPLA2,GAA,SF4,ADM,PPP1R14B	9	MEF2D,USF2,GATAD2B,ADM,ARF1	5		hsa-miR-92a			RPL24,WDR20	2	CACNA1C,BTG2,XPR1	3		hsa-miR-92a			RFX1,PBX3,LMO2,NRF1,FOSL2,FHL2,TP53	7	TEF,RFX1,LMO2,NFAT5,NRF1,SOX4,FHL3,MYT1L,TCF4,FOSL2,MAFK	11
hsa-miR-361-5p			REEP4,ACADS,DCTN2,PAOX,IBRDC3,SRP68,ENTPD2	7				hsa-miR-361-5p			BCAM,WDR20,NR1D1,PTPRT	4				hsa-miR-361-5p			FOXA2,WTIP,NUCB2,CCNDBP1	4	MYT1L,NFAT5	2
hsa-miR-132	C1QL1,PFN2,PPM1G,TJAP1,DEDD	5	RAB25,GSK3A,TJAP1,EXOSC7,MYBBP1A,SF4,MARK2,PPM1G,WDR18,GYLTL1B,DEDD,GPS1,ATP6V0D1,EMILIN2,C1QL1,ACVR1,PDX1	17	ACVR1,TJAP1	2		hsa-miR-132	BTG2	1	SDCBP,DRD1IP,E2F5,SERTAD1,LTB,SURF6,RTN1,ACADM,BTG2	9	E2F5,BTG2	2		hsa-miR-132	ISL1,RFX3,NFAT5,SOX4,CTDSPL,ZHX1	6	ELF3,NKX2-2,FHL3,CCNDBP1,NFE2L2	5	SMAD2,ISL1,SMAD5,NFAT5,SOX4	5
hsa-miR-154*			WHSC2,ALDOA,MRPL46,AP2S1,EIF4G1	5				hsa-miR-154*			RGS14,BTG2	2				hsa-miR-154*
hsa-miR-101	MEF2D,DGCR2,NEUROD1,CFTR,UBE2D2	5	MAD2L2,GRN,DGAT1,SF4,ZBTB7B,ARVCF	6	MEF2D,DGCR2,DCTN2,NEUROD1,ITGA3	5		hsa-miR-101	SRF,STAT6,RIN2	3	ZFP36L2,RIN2,SST,HTRA3	4	SRF,STAT6,BCL9L,HTRA3	4		hsa-miR-101	PBX3,PKNOX1,JUNB,NEUROD1,ETS1,NFE2L2	6	ATF4,PBX3,AGGF1,JUNB,SMAD4,PHTF1	6	PKNOX1,NEUROD1,ETV5,ETS1,PBX3,FOXP4,TCF4,MAFK,FOXP1	9
hsa-miR-200a	DGCR2	1	ZGPAT,BIN1,TIMP1,EXOSC7,MYBBP1A,SLC29A2	6	IGF2	1		hsa-miR-200a			SEC23A,EPHA2,PPP1R3F,STK3,BTG2	5	EPHA2	1		hsa-miR-200a	NR3C2	1	CFDP1,CRIP2,PDLIM1,FOXP1	4	TCF12,MYT1L,FOXA2,RFX1,FOXJ3,TCF4,FOXP1	7
hsa-miR-195	KLC2,G0S2,VAT1,SMARCD2,EGLN2,ARHGDIA,LYPLA2,TRIP10,GHR,USP32,DEDD	11	MAD2L2,G0S2,VAT1,PEMT,SSU72,CAMK2N1,GOT2,BIN1,ENTPD6,GYLTL1B	10	CYBASC3,G0S2,VAT1,IRF2BP1,RAB4B,MYO1C,EGLN2,WNT4,ARHGDIA,LYPLA2,TRIP10,GHR,BAIAP2,GYLTL1B,DEDD	15		hsa-miR-195	BCL9L,LTB,BTG2	3	DRD1IP,DOCK6,CRP,LTB,PLEKHC1,FBXW9,RTN1,HNRPL	8	INSR,BCL9L,FREQ,BTG2,XPR1	5		hsa-miR-195	SMAD5,E2F7,EPHA1,SMAD3,FOSL1,PBX3,DMTF1,CTDSPL,ZHX1	9	PDLIM1,EPHA1,MYCL1	3	SMAD5,LITAF,E2F7,EPHA1,SMAD3,MYT1L,FOSL1,NFIC,BHLHB3,DMTF1,CTDSPL,MAFK	12
hsa-miR-192*			BCKDK,ACADS,HYOU1,EXOSC7,ADRBK1,DCTN1,MYBBP1A	7				hsa-miR-192*			RGS14,CYB5R3,RTN1,STK3	4				hsa-miR-192*			NR1H4,POU2F1,RXRG,SMAD4,ETV5,TCF20	6
hsa-miR-146a	PSMD3	1	COASY,B3GAT3,TIMM17B,PAOX,MARK2,FKBP8,PPP1R14B	7	FLOT2,PSMD3	2		hsa-miR-146a			SDCBP,VIM,CABC1,LTB	4	BTG2	1		hsa-miR-146a	MYT1,NFAT5,MAX,SMAD4	4	MTA2,CHES1,PDLIM1,PBX2,GTF2IRD1,RARA	6	MYT1,PBX2,SMAD4	3
hsa-miR-708			SIRT2,TRPC4AP,PUS1,ATPBD1B,CREB3,LYPLA2,TIMM17B,CRELD1,SHARPIN,ENTPD2	10				hsa-miR-708			EEF1A2,FEV	2				hsa-miR-708			CFDP1,VPS72,THRA,FOXP1,NFE2L2	5	FOXJ3,SMAD4,TRPS1,NFE2L2	4
hsa-miR-192	REEP4,GATAD2B	2	C3,PLCB3,TRIB3,TST,CDK10,SAFB,ARHGEF1	7	GLP1R	1		hsa-miR-192	CACNA1C,NCBP2	2	BGN,DRD1IP,TM4SF4,SPHK1,E2F5,CXCL1	6	PTPRT	1		hsa-miR-192			PKNOX1,ATF1,NR1I2,APBB1,PHTF1	5	ATF1,NFAT5	2
hsa-miR-181a	NRXN3,ITGA3,CAMK2G,CSDA,AGPAT1,ADM,BAIAP2,PLEKHJ1	8	WHSC2,CREB3,COASY,DAPK3,MRPL12,LYPLA2,GOT2,RHOG	8	HYOU1,ITGA3,LYPLA2,GOT2,CAMK2G,AGPAT1,ENTPD6,BAIAP2,ADM,MAEA,PLEKHJ1,ADRBK1	12		hsa-miR-181a	UBE2B,E2F5,WDR20	3	PDZK1IP1,SMPDL3A,E2F5,CABC1	4	UBE2B,SRF,E2F5	3		hsa-miR-181a	PKNOX1,SOX6,NFAT5,E2F7,NCOA2,ETS1,PBX3,CSDA,NKX2-2,CTDSPL,FOXP1	11	HES6,NRF1,FOXP1	3	SMAD2,PKNOX1,SOX6,NFAT5,E2F7,ERF,NCOA2,ETS1,PBX3,RORB,CTDSPL,FOXP1	12
hsa-miR-194	CAMK2G,PFN2,TJAP1,SDAD1	4	GOT2,SSU72,PDX1,AP1B1,MYBBP1A,VCP	6	GOT2,CAMK2G,PFN2,ACVR1,SLC7A5,TJAP1,SDAD1	7		hsa-miR-194	RERE	1	RGS14	1				hsa-miR-194	NFAT5,TRPS1	2	LPXN,ATF7,RARA	3	GMEB2,NFAT5,BHLHB3,ATF7,CTDSPL,TRPS1,RARA	7
hsa-miR-221	FLOT2,GNAI2,SAFB,USP32,DDR1	5	B3GAT3,IFRD2,CLPTM1,ARF1,MYO1C,SERPINA4,PIGT,GNAI2,ENTPD6,NAPA	10	GNAI2,ITGA3	2		hsa-miR-221	MESDC1	1	EFNA1,TM4SF4,SPHK1,RIN2,MESDC1	5	MESDC1	1		hsa-miR-221	SOX6,BBX,SOX4,TRPS1,ETS1,TCF12,PBX3,MORF4L1,RFX3,FOXJ3	10	FOXA2,MORF4L1,NR1I2,ATF2	4	TCF12,NFAT5,TCF4,TRPS1,ETS1	5
		314		1723		531				142		546		268				373		722		745
Transcription Factors only in beta cells (βTF)								Transcription Factors only in alpha cells (αTF)
miRNA	Predictive algorithms							miRNA	Predictive algorithms
	PicTar		Sanger		TargetScan				PicTar		Sanger		TargetScan
	Gene symbols	#	Gene symbols	#	Gene symbols	#			Gene symbols	#	Gene symbols	#	Gene symbols	#
hsa-miR-889			RUNX2	1	EPAS1	1		hsa-miR-889					ZFPM2,MYCN,MAF	3
hsa-miR-494			NPAS2	1	NPAS2	1		hsa-miR-494			ZFHX4,ZFPM2,NFATC2	3	ZFHX4,NFIB,EBF3,ATRX,MAF	5
hsa-miR-127-3p								hsa-miR-127-3p
hsa-miR-323-3p			E2F1,RUNX1	2	VDR,NFIX	2		hsa-miR-323-3p			ZFPM2,NFIB	2	ZFHX4,ZFPM2,NFIB,ATRX	4
hsa-miR-433			CREB3L4,PTF1A	2	EPAS1,CREB1,HOXA1	3		hsa-miR-433			IRF8,NFIB	2	ZFHX4,EBF3	2
hsa-miR-370			ATP1A2	1	RUNX1	1		hsa-miR-370
hsa-miR-345			MDC1	1	RUNX3,RXRB	2		hsa-miR-345
hsa-miR-152	HOXC8,EPAS1	2	E2F1,HOXA2	2	HOXC8,EZH1,EPAS1,NFIX	4		hsa-miR-152	ZFPM2	1	ZFHX4,MYCN	2	ZFPM2,ZHX3,MAF	3
hsa-miR-204	HOXC8,CDX2	2	ATP1A2,CREB3L4,CDX2	3	HOXC8,RUNX2,CDX2	3		hsa-miR-204					ZFHX4	1
hsa-miR-136*			ATP1A2	1				hsa-miR-136*			NFIB,ATOH7,ATRX	3
hsa-miR-379			RARB,CREB3L4,RUNX2	3				hsa-miR-379
hsa-miR-23b	STAT5B,HOXA1,HOXA2	3			VDR,STAT5B,RUNX1,EPAS1,RUNX2,THRB,NFIX	7		hsa-miR-23b	EBF3,FOXA1	2	FOXA1	1	ZFHX4,NFIB,EBF3,MAF	4
hsa-miR-24	TCF7,CDX2	2	TCF7,TCF2	2	TCF7,PPARA,LIMD1,CDX2	4		hsa-miR-24	NFIB,EBF3	2	IRX4	1	EBF3	1
hsa-miR-885-5p			ATP1A2,LIMS2	2	NFIX	1		hsa-miR-885-5p			ZFHX4	1	ZFHX4	1
hsa-miR-495			LIMS2	1	HOXC8,RUNX3,THRB,MSX1	4		hsa-miR-495			NFIB	1	ZFHX4,NFIB,EBF3	3
hsa-miR-485-3p			RUNX2	1	RUNX2,LIMD1	2		hsa-miR-485-3p			NFATC2	1	MYCN	1
hsa-miR-21	PPARA	1	RUNX2,LIMS2	2	TBX2,PPARA,THRB,MSX1	4		hsa-miR-21	NFIB,SMAD7	2	NFIB	1	NFIB,SMAD7	2
hsa-miR-411			POU4F1,PTF1A,TCF2	3	POU4F1	1		hsa-miR-411
hsa-miR-432			CREB3L4,ESRRA	2	ESRRA	1		hsa-miR-432			SIX5	1
hsa-miR-190b			ERG,HOXA2	2	ERG	1		hsa-miR-190b					NFIB,EBF3	2
hsa-miR-125b	ESRRA,TEAD2	2	CREB3L4,ESRRA	2	VDR,ESRRA	2		hsa-miR-125b			SIX5	1	NFIB,MAF	2
hsa-miR-376c			RARB,PTF1A,HOXA2,TCF2	4	RARB,MSX1	2		hsa-miR-376c			NFIB,NFATC2	2	NFIB	1
hsa-miR-376a			CREB3L4,MDC1	2	HOXC8	1		hsa-miR-376a			NFIB,SMAD7	2
hsa-miR-148a	HOXC8,EPAS1	2	E2F1	1	HOXC8,EZH1,EPAS1,NFIX	4		hsa-miR-148a	ZFPM2	1	ATOH7,MYCN	2	ZFPM2,ZHX3,MAF	3
hsa-miR-539			CREB3L4,PTF1A,SHOX2	3	AHR,PPARA	2		hsa-miR-539			ZFHX4	1	ZFHX4,ZFPM2,NFIB,EBF3	4
hsa-miR-543			CREB1	1				hsa-miR-543					ZFHX4,ZFPM2,NFIB,HAND2,MAF,SMAD7	6
hsa-miR-184			RUNX1	1				hsa-miR-184			ZFPM2,NFATC2,ZHX3	3
hsa-miR-27b	RUNX1,ERG,CREB1	3	ATP1A2	1	RUNX1,POU2F3,ERG,PPARA,CREB1,THRB	6		hsa-miR-27b	ZFHX4,EBF3,ATOH7,ATRX	4	ATOH7,NFATC2,ID3	3	ZFHX4,NFIB,EBF3,ID3,ATRX	5
hsa-miR-491-5p			CREB3L4	1	TCF7	1		hsa-miR-491-5p					NFIB	1
hsa-miR-410			CREB3L4	1	RUNX1,ERG,PTF1A	3		hsa-miR-410			NFIB,MYCN	2	ZFHX4,NFIB,ATRX,ZHX3,MAF,SMAD7	6
hsa-miR-185			NFIX	1	NFIX	1		hsa-miR-185
hsa-miR-487b			RUNX2	1				hsa-miR-487b
hsa-miR-382					RUNX1,RUNX3	2		hsa-miR-382					MAF	1
hsa-miR-574-3p			ERG	1				hsa-miR-574-3p			IRX4	1
hsa-miR-331-3p			CREB3L4	1				hsa-miR-331-3p			IRF8	1
hsa-miR-30a*			CREB3L4,EZH1	2				hsa-miR-30a*			MYCN	1
hsa-miR-656			PTF1A,MSX1	2	AHR,RUNX3,THRB,MSX1	4		hsa-miR-656			HEY1,IRX4	2	ATRX,SMAD7	2
hsa-miR-335	NPAS2	1	NPAS2,AHR	2	POU2F3,PPARA	2		hsa-miR-335
hsa-miR-129-3p			TEAD2,TCF7	2	RUNX2,ABLIM1	2		hsa-miR-129-3p
hsa-miR-324-5p			ESRRA,TBX2,FOXE1,MDC1	4	RUNX1	1		hsa-miR-324-5p	ZHX3	1			ZHX3	1
hsa-miR-668			ATP1A2,GATA1	2				hsa-miR-668			NFIB,ID3,ZHX3	3	NFIB	1
hsa-miR-15a	HOXC8,RARB,ESRRA,EZH1,CDX2	5	ABLIM1	1	HOXC8,RARB,GATA4,ESRRA,EZH1	5		hsa-miR-15a	ZHX3,SMAD7	2			ZFHX4,ZHX3,SMAD7	3
hsa-miR-193b	RARB	1	E2F1,POU2F3,CREB3L4	3				hsa-miR-193b	MYCN,ZHX3	2	EBF3,MYCN,ZHX3	3	ZHX3	1
hsa-miR-409-5p			NPAS2,FOXE1	2				hsa-miR-409-5p
hsa-miR-409-3p			ATP1A2,RUNX1,NPAS2	3	SHOX2,NFIX	2		hsa-miR-409-3p					ZFHX4,EBF3	2
hsa-miR-27a	RUNX1,ERG,CREB1	3	ATP1A2	1	RUNX1,POU2F3,ERG,PPARA,CREB1,THRB	6		hsa-miR-27a	ZFHX4,EBF3,ATOH7,ATRX	4	ATOH7,NFATC2,ID3	3	ZFHX4,NFIB,EBF3,ID3,ATRX	5
hsa-miR-96	EPAS1,CREB1	2	ATP1A2	1	POU2F3,AHR,EPAS1,SHOX2	4		hsa-miR-96	EBF3,SMAD7	2			ZFHX4,EBF3,MAF,SMAD7	4
hsa-miR-758			RUNX1,TCF7	2	STAT5B	1		hsa-miR-758			SIX5	1	ZFHX4,ZFPM2,IRX2	3
hsa-miR-22*			CREB3L4,PTF1A	2				hsa-miR-22*			ID3,IRX2	2
hsa-miR-30a					RUNX1,RARB,ERG,RUNX2,HOXA1,AR	6		hsa-miR-30a					NFIB,EBF3,MAF,IRX4	4
hsa-miR-484			E2F1	1				hsa-miR-484			IRX4	1
hsa-miR-340*			GATA1,ARNTL2	2				hsa-miR-340*
hsa-let-7b	HOXA1	1	EZH1,MDC1	2	EZH1,PPARA,LIMD1	3		hsa-let-7b	MYCN	1	NFATC2	1	MYCN	1
hsa-miR-381			NPAS2	1	HOXC8,POU4F1,SHOX2,THRB	4		hsa-miR-381			HEY1,ZFPM2,MYCN	3	ZFHX4,ZFPM2,EBF3,MYCN,ATRX	5
hsa-miR-29c*			MSX1,RXRB,ABLIM1	3				hsa-miR-29c*			MYCN	1
hsa-miR-30e*			CREB3L4	1				hsa-miR-30e*			MYCN	1
hsa-miR-598			E2F1,LIMS2,MDC1	3				hsa-miR-598
hsa-let-7c	HOXA1	1	EZH1,MDC1	2	EZH1,PPARA,LIMD1	3		hsa-let-7c	MYCN	1			MYCN	1
hsa-miR-483-5p			SHOX2,RXRB	2				hsa-miR-483-5p			NFATC2	1
hsa-miR-203	RARB,AHR,HOXA1	3	CREB3L4,ARNTL2	2	TBX3,AHR,RUNX2,THRB	4		hsa-miR-203	GATA6,EBF3	2	NFIB	1	ZFHX4,NFIB	2
hsa-miR-22	RUNX1,PPARA,CDX2	3	MDC1	1	PPARA	1		hsa-miR-22	SMAD7	1			NFIB	1
hsa-miR-183			CDX2	1				hsa-miR-183	ZFPM2	1	ZFPM2	1	ZFPM2,ZHX3	2
hsa-miR-29a	RARB,AHR	2	MSX1	1	RARB,NFIX	2		hsa-miR-29a	MYCN	1	SIX5,NFATC2,ID3,MYCN	4	NFIB,SIX5,MYCN,ZHX3	4
hsa-miR-182	EPAS1,CREB1,ABLIM1	3	PTF1A	1	AHR,EPAS1,CREB1,ABLIM1	4		hsa-miR-182	EBF3	1	HEY1	1	EBF3,ZHX3,MAF,SMAD7	4
hsa-miR-320	RUNX1,NPAS2	2	MDC1	1				hsa-miR-320	ZFPM2,ATRX	2	NFIB	1
hsa-miR-29b	RARB,AHR	2			RARB,NFIX	2		hsa-miR-29b	MYCN	1	SIX5,NFATC2,ID3,MYCN	4	NFIB,SIX5,MYCN,ZHX3	4
hsa-miR-337-5p								hsa-miR-337-5p			GATA6,HAND2,MAF	3
hsa-miR-29b-2*								hsa-miR-29b-2*			ZHX3	1
hsa-miR-380*								hsa-miR-380*
hsa-miR-129-5p			RUNX1,CEBPE,HOXA2	3	STAT5B,RUNX1,NFIX	3		hsa-miR-129-5p					ZFHX4,NFIB	2
hsa-miR-655			ATP1A2,HOXA2	2	TBX2,SHOX2	2		hsa-miR-655					ZFPM2,NFIB,MAF	3
hsa-miR-369-3p			PTF1A	1	MSX1,NFIX	2		hsa-miR-369-3p	ZFHX4,ZFPM2,EBF3,SMAD7	4	GATA6,ZFPM2	2	ZFHX4,ZFPM2	2
hsa-miR-26a	ATP1A2,EPAS1	2	MSX1	1	ATP1A2,GATA4	2		hsa-miR-26a	ZFHX4	1	GATA6	1	ZFHX4	1
hsa-miR-324-3p			CREB3L4,ASCL2,LIMS2,RXRB	4	VDR,RXRB	2		hsa-miR-324-3p	ATRX	1
hsa-miR-376a*			AHR,RUNX3	2				hsa-miR-376a*			IRX2,ZHX3	2
hsa-miR-154			CREB3L4,PTF1A,ASCL2	3				hsa-miR-154			HEY1	1	MAF	1
hsa-miR-30c	RUNX1,RARB,ERG,HOXA1	4			RUNX1,RARB,ERG,RUNX2,HOXA1,AR	6		hsa-miR-30c	NFIB,EBF3,FOXA1,IRX4	4	NFIB	1	NFIB,EBF3,MAF,IRX4	4
hsa-miR-770-5p			SHOX2	1				hsa-miR-770-5p					NFIB	1
hsa-miR-493*			RUNX2	1				hsa-miR-493*
hsa-miR-145	ERG	1	SHOX2,RUNX3	2	ERG,RUNX3	2		hsa-miR-145			NFIB,MYCN	2	ZFHX4,NFIB,EBF3,MYCN,ATRX,MAF	6
hsa-miR-29c	RARB,AHR	2	MSX1	1	RARB,NFIX	2		hsa-miR-29c	MYCN	1	SIX5,NFATC2,ID3,MYCN	4	NFIB,SIX5,MYCN,ZHX3	4
hsa-miR-183*								hsa-miR-183*
hsa-miR-148b	HOXC8,EPAS1	2	E2F1,HOXA2	2	HOXC8,EZH1,EPAS1,NFIX	4		hsa-miR-148b	ZFPM2	1	MYCN	1	ZFPM2,ZHX3,MAF	3
hsa-miR-340					STAT5B,AHR,EPAS1	3		hsa-miR-340			ZFPM2	1	ZFHX4,ZFPM2,NFIB,ID3,MAF,SMAD7	6
hsa-miR-493			E2F1,CREB3L4	2				hsa-miR-493			ZHX3	1	MAF	1
hsa-miR-628-5p			AHR	1				hsa-miR-628-5p			IRX2	1
hsa-miR-103	HOXC8,RARB,ESRRA,EZH1,CDX2	5	ESRRA	1	NPAS2,THRB	2		hsa-miR-103	ZFPM2,ZHX3,SMAD7	3	ZFPM2	1	ZFPM2,NFIB,ZHX3	3
hsa-miR-374b			MSX1	1	EPAS1,MSX1,NFIX	3		hsa-miR-374b			NFIB	1	NFIB	1
hsa-miR-30e					RUNX1,RARB,ERG,RUNX2,HOXA1,AR	6		hsa-miR-30e					NFIB,EBF3,MAF,IRX4	4
hsa-miR-149			TEAD2,LIMS2	2	NFIX	1		hsa-miR-149	NFIB	1	NFIB,ID3	2	NFIB	1
hsa-miR-30d	RUNX1,RARB,ERG,HOXA1	4	CREB3L4	1	RUNX1,RARB,ERG,RUNX2,HOXA1,AR	6		hsa-miR-30d	NFIB,EBF3,FOXA1,IRX4	4	NFIB	1	NFIB,EBF3,MAF,IRX4	4
hsa-miR-130b	HOXC8,POU4F1,CEBPE,RUNX3	4	ESRRA,HOXA2	2	HOXC8,POU4F1,RUNX3,AR	4		hsa-miR-130b	ZFPM2,ATRX	2			ZFPM2,NFIB,EBF3,ATRX,MAF	5
hsa-miR-337-3p			SHOX2	1				hsa-miR-337-3p					ZFHX4	1
hsa-miR-134					STAT5B	1		hsa-miR-134	ZFPM2,MYCN,TCF21	3
hsa-miR-99b	HOXA1	1	ATP1A2,HOXA1	2	HOXA1	1		hsa-miR-99b			SMAD7	1
hsa-miR-7			CREB3L4,TBX2,TCF2	3				hsa-miR-7	GATA6,ATRX	2	ID3	1	GATA6,NFIB	2
hsa-miR-99a	HOXA1	1	ATP1A2,HOXA1	2	HOXA1	1		hsa-miR-99a	SMAD7,FOXA1	2	NFATC2,SMAD7	2
hsa-miR-411*			CDX2	1				hsa-miR-411*			NFIB	1
hsa-miR-328	ESRRA	1	ESRRA,CEBPE,ASCL2,NFIX	4	LIMD1	1		hsa-miR-328					EBF3	1
hsa-miR-551b			RUNX1,CREB1	2				hsa-miR-551b			ATOH7	1
hsa-miR-671-3p			RUNX2,SHOX2	2				hsa-miR-671-3p
hsa-miR-369-5p			NPAS2,ERG	2				hsa-miR-369-5p			NFIB,ATOH7,NFATC2	3
hsa-miR-296-5p			TBX2,LIMS2,CDX2	3				hsa-miR-296-5p			HAND2,SIX5	2
hsa-let-7a	HOXA1	1	EZH1,MDC1	2	EZH1,PPARA,LIMD1	3		hsa-let-7a	MYCN	1			MYCN	1
hsa-miR-15a*			GATA1	1				hsa-miR-15a*			NFIB	1
hsa-miR-93*			ATP1A2,EZH1	2				hsa-miR-93*			SMAD7	1
hsa-miR-26b	ATP1A2,EPAS1	2			ATP1A2,GATA4	2		hsa-miR-26b	ZFHX4	1			ZFHX4	1
hsa-miR-429			TCF2	1	GATA4	1		hsa-miR-429			ZFPM2,NFIB,MYCN	3	ZFHX4,ZFPM2,NFIB,MYCN,ATRX,MAF	6
hsa-miR-301a					HOXC8,POU4F1,RUNX3,AR	4		hsa-miR-301a					ZFPM2,NFIB,EBF3,ATRX,MAF	5
hsa-miR-216b			NPAS2,TBX2,HOXA1	3	NPAS2,TBX2,HOXA1,NFIX,ABLIM1	5		hsa-miR-216b
hsa-miR-200b*								hsa-miR-200b*
hsa-miR-654-3p			PTF1A	1				hsa-miR-654-3p
hsa-miR-139-5p			CEBPE	1	RUNX1	1		hsa-miR-139-5p			IRX2	1	NFIB,ATRX,MAF	3
hsa-miR-7-2*			CREB3L4,HOXA1,LIMD1	3				hsa-miR-7-2*			NFIB,IRX2	2
hsa-miR-186			RUNX2,TCF7	2				hsa-miR-186	ZFHX4,ATRX	2			IRF8,NFIB	2
hsa-miR-654-5p			NPAS2	1	NPAS2	1		hsa-miR-654-5p
hsa-miR-191	SHOX2	1	HOXC8,HOXA2	2				hsa-miR-191			HEY1,NFATC2,ID3,MAF,IRX4	5
hsa-miR-375	RUNX1,AHR	2	RUNX2,TCF2,FOXE1,RXRB	4	AHR,SHOX2,NFIX	3		hsa-miR-375	GATA6,ZFHX4,ZFPM2,EBF3	4	ZFPM2,EBF3	2	GATA6,ZFHX4,EBF3	3
hsa-miR-16	HOXC8,RARB,ESRRA,EZH1,CDX2	5	ESRRA,RUNX2,CDX2	3	HOXC8,RARB,GATA4,ESRRA,EZH1	5		hsa-miR-16	ZHX3,SMAD7	2			ZFHX4,ZHX3,SMAD7	3
hsa-miR-34a	RARB,ESRRA,POU4F1	3	PTF1A	1	ATP1A2,ESRRA,ABLIM1	3		hsa-miR-34a	ZFHX4	1	MYCN,SMAD7	2	ZFHX4,MYCN	2
hsa-miR-744			NFIX	1				hsa-miR-744			ATOH7	1
hsa-miR-7-1*			CREB3L4,HOXA1	2				hsa-miR-7-1*			NFIB,IRX2	2
hsa-miR-200c	GATA4	1	TCF2	1	GATA4	1		hsa-miR-200c	ZFHX4,ZFPM2,MYCN,ATRX	4	ZFPM2,MYCN	2	ZFHX4,ZFPM2,NFIB,MYCN,ATRX,MAF	6
hsa-miR-25	HOXC8,CREB1	2	ARNTL2,TCF2	2	TBX3,HOXC8,PTF1A,NFIX	4		hsa-miR-25	GATA6,NFIB,HAND2,ATRX,TCF21,SMAD7	6	NFIB	1	GATA6,ZFHX4,ZFPM2,NFIB,HAND2,ATRX,SMAD7	7
hsa-miR-301b					HOXC8,POU4F1,RUNX3,AR	4		hsa-miR-301b			NFIB,IRX4	2	ZFPM2,NFIB,EBF3,ATRX,MAF	5
hsa-miR-597			ATP1A2,LIMS2	2				hsa-miR-597					NFIB	1
hsa-miR-339-3p			GATA1	1				hsa-miR-339-3p
hsa-miR-92a			ARNTL2,TCF2	2	TBX3,HOXC8,PTF1A,NFIX	4		hsa-miR-92a			NFIB,TCF21	2	GATA6,ZFHX4,ZFPM2,NFIB,HAND2,ATRX,SMAD7	7
hsa-miR-361-5p					ERG	1		hsa-miR-361-5p					ZFPM2,NFIB,ZHX3	3
hsa-miR-132			CEBPE	1				hsa-miR-132	FOXA1	1	HEY1,NFIB,FOXA1	3	ZFHX4,NFIB,MAF,FOXA1	4
hsa-miR-154*			PTF1A,RUNX2	2				hsa-miR-154*
hsa-miR-101	RUNX1,RARB,RXRB	3	ARNTL2,RXRB	2	RUNX1,PPARA,THRB,MSX1,RXRB	5		hsa-miR-101	ZFHX4,MYCN,ATRX	3	ZFHX4,ZFPM2,MYCN	3	ZFHX4,NFIB,MYCN,ATRX	4
hsa-miR-200a					STAT5B,RUNX1,RARB,POU4F1,PPARA,THRB	6		hsa-miR-200a			GATA6,FOXA1	2	GATA6,MAF,FOXA1	3
hsa-miR-195	HOXC8,RARB,ESRRA,EZH1,CDX2	5	ESRRA,RUNX2,CDX2	3	HOXC8,RARB,GATA4,ESRRA,EZH1	5		hsa-miR-195	ZHX3,SMAD7	2	SMAD7	1	ZFHX4,ZHX3,SMAD7	3
hsa-miR-192*			HOXA1	1				hsa-miR-192*
hsa-miR-146a	RARB	1	RUNX1,NFIX	2				hsa-miR-146a					TCF21	1
hsa-miR-708			RXRB	1				hsa-miR-708
hsa-miR-192	TCF7	1	TCF7	1	RUNX1	1		hsa-miR-192	ZFHX4	1	ZFHX4,NFIB	2
hsa-miR-181a	HOXC8,RUNX1,CREB1	3	TCF2	1	HOXC8,RUNX1,PPARA,CREB1,HOXA1,THRB,CDX2	7		hsa-miR-181a	GATA6,MYCN,SMAD7	3			GATA6,ZFHX4,HAND2,SMAD7	4
hsa-miR-194	STAT5B	1	RUNX2	1	STAT5B	1		hsa-miR-194	ZFHX4,FOXA1	2	NFIB,SIX5	2	ZFHX4,SIX5	2
hsa-miR-221					THRB	1		hsa-miR-221	ZFPM2,EBF3	2	ZFPM2	1	ZFPM2	1
		104		214		244				98		150		244
